# Supplementary material for: Dipyridinoarsole: a new class of stable and modifiable heteroatom-bridged bipyridines
Source: Royal Society of Chemistry journal article supplement (doi:10.1039/d0cc02389b), 2020-01-01
Supplement: d0cc02389b1.pdf [file d0cc02389b1.pdf]

## Supporting Information

# Dipyridinoarsole: A new class of stable and modifiable heteroatom-bridged bipyridines

Toshiki Fujii,<sup>a</sup> Susumu Tanaka,<sup>a</sup> Shotaro Hayashi,<sup>\*c</sup> Hiroaki Imoto<sup>\*a,b</sup> and Kensuke Naka<sup>\*a,b</sup>

a. Faculty of Molecular Chemistry and Engineering, Kyoto Institute of Technology, Goshokaido-cho, Matsugasaki, Sakyo-ku, Kyoto 606-8585, Japan.

b. Materials Innovation Lab, Kyoto Institute of Technology, Goshokaido-cho, Matsugasaki, Sakyo-ku, Kyoto 606-8585, Japan.

c. School of Environmental Science and Engineering, Kochi University of Technology, Kami, Kochi, 782-8502, Japan.

### Table of Contents

1. Materials
2. Measurement
3. X-ray crystallographic data for single crystalline products
4. Synthesis
5. NMR spectra
6. Crystallographic data
7. Optical properties
8. Cyclic voltammetric analysis
9. Theoretical calculation
10. Reference

## 1. Materials

Chloroform (CHCl<sub>3</sub>), dichloromethane (CH<sub>2</sub>Cl<sub>2</sub>), methanol (MeOH), ethylacetate (EtOAc), iodomethane (CH<sub>3</sub>I), ammonia solution (NH<sub>3</sub>, 28%), sodium sulfonate (NaSO<sub>4</sub>), sodium thiosulfate pentahydrate (Na<sub>2</sub>S<sub>2</sub>O<sub>3</sub>·5H<sub>2</sub>O), hydrogen peroxide (H<sub>2</sub>O<sub>2</sub>, 30%), and dichlorophenylphosphine (PhPCl<sub>2</sub>) were purchased from Nacalai Tesque, Inc. Superdehydrated tetrahydrofuran (stabilizer free) (THF), distilled water, *n*-butyllithium solution (*n*-BuLi, 1.6 M in hexane), diethyl ether (Et<sub>2</sub>O), and magnesium sulfate anhydrous (MgSO<sub>4</sub>), ammonium chloride (NH<sub>4</sub>Cl), iodine (I<sub>2</sub>), *N,N*-dimethylformamide (DMF), acetonitrile (CH<sub>3</sub>CN), and ferrocene were purchased from Wako Pure Chemical Industry, Ltd. Methyl Trifluoromethanesulfonate (MeOTf), 3-bromopyridine, copper(II) chloride (CuCl<sub>2</sub>), lithium diisopropyl amide solution (2.0 M in THF/heptane/ethylbenzene), and benzyl bromide (BnBr) were purchased from Tokyo Chemical Industry Co., Ltd. Diiodophenylarsine,<sup>1</sup> 3,3'-dibromo-4,4'-bipyridine,<sup>2</sup> and dipyridinophosphole-oxide (**6**)<sup>2</sup> were prepared according to literature procedures.

## 2. Measurement

<sup>1</sup>H- (400 MHz) and <sup>13</sup>C- (100 MHz) NMR spectra were recorded on a Bruker AVANCE III 400 spectrometer. The samples were analyzed in CDCl<sub>3</sub> using Me<sub>4</sub>Si as an internal standard. The following abbreviations are used; s: singlet, d: doublet, t: triplet, m: multiplet. High-resolution mass spectra (HRMS) were obtained on a JEOL JMS-SX102A spectrometer. The UV-vis spectra were recorded on a Jasco spectrophotometer (V-670 KKN). Emission spectra were obtained on an FP-8500 instrument (JASCO), and absolute PL quantum yields ( $\Phi$ ) were determined using a JASCO ILFC-847S instrument. Emission lifetimes were measured using Quantaaurus-Tau (Hamamatsu Photonics). Spectroelectrochemistry measurements were performed by an Ocean Optics USB4000-XR1 fibre spectrometer with DH2000-BAL tungsten halogen light source and a potentiostat HOKUTO DENKO HAF501. A three-electrode system equipped with the Pt mesh working electrode, Pt counter electrode and Ag/AgCl as a reference electrode was used in an electrolytic solution of DMF containing 0.1 M NBu<sub>4</sub>PF<sub>6</sub>. In the spectroelectrochemistry, the time for applying potentials was altered from 30 sec to 3 min, and it was confirmed that the UV-vis absorption spectra were not changed.

## 3. X-ray crystallographic data for single crystalline products

The single crystal was mounted on a nylon loop. Intensity data were collected at room temperature on a Rigaku XtaLAB mini with graphite monochromated Mo K $\alpha$  radiation. Readout was performed in the 0.073 mm pixel mode. The data were collected at room temperature to a maximum  $2\theta$  value of 55.0°. Data were processed using the Crystal Clear program.<sup>3</sup> An empirical absorption correction<sup>4</sup> was applied. The data were corrected for Lorentz and polarization effects. The structure was solved by the direct method<sup>5</sup> and expanded using Fourier techniques. Non-hydrogen atoms were refined anisotropically. Hydrogen atoms were refined using the riding model. The final cycle of full-matrix least-squares refinement on  $F^2$  was based on observed reflections and variable parameters. All calculations were performed using the CrystalStructure<sup>6</sup> crystallographic software package except for refinement, which was performed using SHELXL2013.<sup>6</sup> Crystal data and more information on X-ray data collection are summarized in Tables S1-7.

## 4. Synthesis

### Note

Low molecular weight organoarsenic compounds have volatility, and it is necessary to avoid the procedures generating volatile organoarsenic compounds. For safety, experiments should be performed in a fume hood. Besides, in a few cases, spontaneously flammable compounds are obtained as described in the literature,<sup>7</sup> and thus fire prevention measures should be taken.

### 9-Phenyl-9H-arsolo[2,3-c:5,4-c']dipyridine (**1**)

1.6 M *n*-hexane solution of *n*-BuLi (3.0 mL, 4.80 mmol, 2.0 eq) was added dropwise to a THF mixed solution (THF: 96 mL) of 3,3'-dibromo-4,4'-bipyridine (0.753 g, 2.40 mmol, 1.0 eq) at -100 °C under N<sub>2</sub> atmosphere and the mixture was stirred at that temperature for 1 hour. Then, separately prepared diiodophenylarsine (1.1 eq) was added dropwise into the mixture. The mixture was heated to 40 °C and stirring for 1 h. Distilled water was poured into the reaction mixture at 0 °C, and the organic layer was concentrated in vacuo. The aqueous layer was extracted with CHCl<sub>3</sub>, and the combined organic phase was dried over MgSO<sub>4</sub>, filtered and concentrated under reduced pressure. The residue was purified through the silica column chromatography (eluent: *n*-hexane/ EtOAc = 1/4). The title compound was obtained as white solids (56%, 413 mg, 1.35 mmol). The single crystal of **1** was obtained by slow evaporation of saturated solution in CH<sub>2</sub>Cl<sub>2</sub>.

<sup>1</sup>H-NMR (acetone-*d*<sub>6</sub>, 400 MHz):  $\delta$  9.12 (s, 2H), 8.78 (d,  $J$  = 5.2 Hz, 2H), 8.16 (dd,  $J$  = 5.2, 0.8 Hz, 2H), 7.32-7.26 (m, 5H) ppm; <sup>13</sup>C-NMR (CDCl<sub>3</sub>, 100 MHz):  $\delta$  152.72, 151.06, 150.00, 141.88, 132.21, 129.40, 129.16, 117.85 ppm. HR-FAB-MS ( $m/z$ ): calculated for C<sub>16</sub>H<sub>12</sub>N<sub>2</sub>As [M+H]<sup>+</sup>: 307.0216; found: 307.0223.

### 9-Phenyl-9H-arsolo[2,3-c:5,4-c']dipyridine-9-oxide (**2**)

A THF (2.7 mL) solution of **1** (39.9 mg, 0.130 mmol) and H<sub>2</sub>O<sub>2</sub> (30%, 89.8 mg) was stirred for 3 h under ambient conditions. Then saturated Na<sub>2</sub>S<sub>2</sub>O<sub>3</sub> aq was added into the mixture at 0 °C. The products were extracted with CHCl<sub>3</sub>, and the organic layer was dried over MgSO<sub>4</sub>. After filtration, the volatiles were removed in vacuo. The crude product was washed with the mixture of 2-propanol and hexane to obtain the title compound as white solids (83%, 34.8 mg, 0.108 mmol)

<sup>1</sup>H-NMR (acetone-*d*<sub>6</sub>, 400 MHz): δ 9.07 (s, 2H), 8.99 (d, *J* = 5.2 Hz, 2H), 7.91 (d, *J* = 5.2 Hz, 2H), 7.68-7.61 (m, 3H), 7.53 (dd, *J* = 7.4 Hz, 2H), 7.48-7.32 (m, 4H), 7.29-7.26 (m, 3H) ppm; <sup>13</sup>C-NMR (acetone-*d*<sub>6</sub>, 100 MHz): δ 154.45, 151.65, 146.55, 133.36, 130.39, 130.36, 129.98, 128.30, 117.67 ppm; HR-FAB-MS (*m/z*): calculated for C<sub>16</sub>H<sub>11</sub>N<sub>2</sub>AsO<sub>2</sub>Na [M+Na]<sup>+</sup>: 344.9980 found: 344.9979.

#### *Gold(9-phenyl-9H-arsolo[2,3-c:5,4-c']dipyridine) chloride (3)*

A CH<sub>2</sub>Cl<sub>2</sub> solution (10 mL) of **1** (29.8 mg, 0.0973 mmol) and AuCl (27.5 mg, 0.118 mmol, 1.2 eq) was stirred at room temperature under nitrogen atmosphere. After stirring for 2 h. After stirring for 3 h, the precipitate was filtered off and then the mixture was concentrated in vacuo to obtain the titled compound as yellow powders (62%, 32.5 mg, 0.0603 mmol). The single crystal of **2** was obtained by slow evaporation of saturated solution in CH<sub>2</sub>Cl<sub>2</sub>.

<sup>1</sup>H-NMR (acetone-*d*<sub>6</sub>, 400 MHz): δ 9.03 (s, 2H), 8.95 (d, *J* = 5.1 Hz, 2H), 7.97 (d, *J* = 5.3 Hz, 2H), 7.52-7.49 (m, 1H), 7.41-7.40 (m, 4H) ppm; <sup>13</sup>C-NMR (acetone-*d*<sub>6</sub>, 100 MHz) cannot be measured due to the low solubility. HR-FAB-MS (*m/z*): calculated for C<sub>16</sub>H<sub>12</sub>N<sub>2</sub>AsAuCl [M+H]<sup>+</sup>: 538.9570; found: 538.9565.

#### *2,7-Dimethyl-9-Phenyl-9H-arsolo[2,3-c:5,4-c']dipyridium iodide (4-I)*

To a MeOH solution (MeOH:9.0 mL) of **1** (34.8 mg, 0.114 mmol) was added methyl iodide (0.50 mL, 70 eq) and the mixture was heated to 60 °C for 3 d. After the mixture was cooled to room temperature, EtOAc was added to the mixture and the precipitate was collected via vacuum filtration to obtain the title compound as black red powders (66%, 44.5 mg, 0.0754 mmol).

<sup>1</sup>H-NMR (CD<sub>3</sub>CN, 400 MHz): δ 9.27 (s, 2H), 8.91 (d, *J* = 6.4 Hz, 2H), 8.83 (d, *J* = 6.8 Hz, 2H), 7.41-7.39 (m, 1H), 7.33-7.32 (m, 4H), 4.38 (s, 6H) ppm; <sup>13</sup>C-NMR (CD<sub>3</sub>CN, 100 MHz) cannot be measured due to the low solubility. HR-FAB-MS (*m/z*): calculated for C<sub>18</sub>H<sub>17</sub>N<sub>2</sub>As [M-2I]<sup>+</sup>: 336.0608; found: 336.0600.

#### *2,7-dimethyl-9-Phenyl-9H-arsolo[2,3-c:5,4-c']dipyridium 1,1,1-trifluoromethanesulfonate (4-TfO)*

To a CH<sub>2</sub>Cl<sub>2</sub> solution of **1** (30.7 mg, 0.10 mmol) was added dropwise methyl triflate (0.10 mL, 0.95 mmol, 9.5 eq) at 0 °C. Then the solution was stirred at room temperature for 5 h. Then the precipitate was isolated via vacuum filtration to obtain the title compound as light-yellow solids (82%, 51.7 mg, 0.0815 mmol).

<sup>1</sup>H-NMR (CD<sub>3</sub>CN, 400 MHz): δ 9.13 (s, 2H), 8.87 (d, *J* = 6.4 Hz, 2H), 8.77 (d, *J* = 6.4 Hz, 2H), 7.43-7.27 (m, 5H), 4.37 (s, 6H) ppm; <sup>13</sup>C-NMR (CD<sub>3</sub>CN, 100 MHz): δ 155.85, 149.76, 149.37, 147.26, 134.33, 133.95, 131.70, 130.54, 125.20, 49.91 ppm; <sup>19</sup>F-NMR (CD<sub>3</sub>CN, 376 MHz): δ -80.42 (s) ppm; HR-FAB-MS (*m/z*): calculated for C<sub>20</sub>H<sub>17</sub>N<sub>2</sub>AsF<sub>6</sub>O<sub>6</sub>S<sub>2</sub>Na [M+Na]<sup>+</sup>: 656.9546; found: 656.9547.

#### *9-Phenyl-9H-phospholo[2,3-c:5,4-c']dipyridine (5)*

1.6 M *n*-hexane solution of *n*-BuLi (1.5 mL, 2.40 mmol, 2.0 eq) was added dropwise to a THF mixed solution (THF: 60mL) of 3,3'-dibromo-4,4'-bipyridine (0.379 g, 1.21 mmol, 1.0 eq) at -100 °C under N<sub>2</sub> atmosphere and the mixture was stirred at that temperature for 1 h. Then, dichlorophenylphosphine (1.0 eq) was added dropwise into the mixture. The mixture was heated to 40 °C and stirring for 40 min. Distilled water was poured into the reaction mixture, and the organic layer was concentrated in vacuo. The aqueous layer was extracted with CHCl<sub>3</sub>, and the combined organic phase was dried over Na<sub>2</sub>SO<sub>4</sub>, filtered and concentrated under reduced pressure. The residue was purified through the silica column chromatography (eluent: *n*-hexane/EtOAc = 1/9). The title compound was obtained as light-yellow solids (25%, 78.1 mg, 0.298 mmol). The single crystal of **6** was obtained by slow evaporation of saturated solution in CH<sub>2</sub>Cl<sub>2</sub>.

<sup>1</sup>H-NMR (acetone-*d*<sub>6</sub>, 400 MHz): δ 9.08 (s, 12), 8.80 (d, *J* = 4.8 Hz, 2H), 8.21 (d, *J* = 5.2 Hz, 2H), 7.35-7.34 (m, 5H) ppm; <sup>13</sup>C-NMR (acetone-*d*<sub>6</sub>, 100 MHz): δ 152.83, (d, *J* = 22.6 Hz), 150.75, 149.64 (d, *J* = 1.5 Hz), 139.32 (d, *J* = 10.0 Hz), 134.30 (d, *J* = 18.2 Hz), 1333.30 (d, *J* = 20.6 Hz), 130.93, 130.03 (d, *J* = 7.8 Hz), 118.37 ppm; <sup>31</sup>P-NMR (acetone-*d*<sub>6</sub>, 162 MHz): δ -16.40 Hz; HR-FAB-MS (*m/z*): calculated for C<sub>16</sub>H<sub>12</sub>N<sub>2</sub>P [M]<sup>+</sup>: 263.0675; found: 263.0743.

#### *2,7-Dimethyl-9-Phenyl-9H-phospholo[2,3-c:5,4-c']dipyridium 1,1,1-trifluoromethanesulfonate (7)*

To a CH<sub>2</sub>Cl<sub>2</sub> solution of **6** (27.5 mg, 0.11 mmol) was added dropwise methyl triflate (0.10 mL, 0.95 mmol, 9.5 eq) at 0 °C. Then the solution was stirred at ambient temperature. Then the precipitate was collected via vacuum filtration to obtain the title compound as yellow solids (96%, 59.1 mg, 0.100 mmol).

<sup>1</sup>H-NMR (CD<sub>3</sub>CN, 400 MHz): δ 9.15 (s, 2H), 8.85 (d, 4H), 7.54 (m, 1H), 7.42-7.37 (m, 4H), 4.37 (s, 6H) ppm; <sup>19</sup>F-NMR (CD<sub>3</sub>CN, 376 MHz): δ -80.42 (s) ppm; <sup>31</sup>P-NMR (CD<sub>3</sub>CN, 162 MHz): δ -5.92 Hz; HR-ESI-MS (*m/z*): calcd. for C<sub>19</sub>H<sub>17</sub>N<sub>2</sub>PF<sub>3</sub>O<sub>3</sub>S [M-TfO]<sup>+</sup>: 441.0650; found: 441.0632.

#### *9-Phenyl-2,7-bis(phenylmethyl)-9H-arsolo[2,3-c:5,4-c']dipyridium bromide (8-Br)*

A neat mixture of **1** (38.4 mg, 0.125 mmol) and benzylbromide (5.0 mL, excess) was heated at 50 °C for 3 d while stirring. The mixture was allowed to cool to room temperature and the precipitate vacuum filtration and washed with a mixture of MeOH:diethyl ether:CHCl<sub>3</sub> (1:10:2). The title compound was obtained as orange solids (93%, 75.3 mg, 0.116 mmol).

$^1\text{H-NMR}$  ( $\text{CD}_3\text{CN}$ , 400 MHz):  $\delta$  9.66 (s, 2H), 9.15 (d,  $J$  = 6.8 Hz, 2H), 8.92 (d,  $J$  = 6.4 Hz, 2H), 7.55-7.26 (m, 15H), 5.85 (s, 4H) ppm;  $^{13}\text{C-NMR}$  ( $\text{CD}_3\text{CN}$ , 100 MHz) cannot be measured due to the low solubility. HR-FAB-MS ( $m/z$ ): calculated for  $\text{C}_{30}\text{H}_{25}\text{N}_2\text{AsBr}$   $[\text{M-Br}]^+$ : 488.1234; found: 488.1236.

**9-Phenyl-2,7-bis(phenylmethyl)-9H-arsolo[2,3-c:5,4-c']dipyridium 1,1,1-trifluoromethanesulfonate (8-TfO)**

To a suspension of **5-Br** (39.6 mg, 0.0611 mmol) in  $\text{CH}_2\text{Cl}_2$  (20.0 mL) was added dropwise methyl triflate (0.03 mL, 0.3 mmol, 5 eq) at 0 °C. The mixture was stirred at ambient temperature for 10 hours. The solution was concentrated under reduced pressure. Then the crude crystal was washed with  $\text{CH}_2\text{Cl}_2$  to afford the title compound as yellow crystals (84%, 40.4 mg, 0.0514 mmol).

$^1\text{H-NMR}$  ( $\text{CD}_3\text{CN}$ , 400 MHz):  $\delta$  9.26 (s, 2H), 9.02 (d,  $J$  = 6.0 Hz, 2H), 8.82 (d,  $J$  = 6.4 Hz, 2H), 7.48 (s, 10H), 7.43-7.92 (m, 5H), 5.79 (s, 4H) ppm;  $^{13}\text{C-NMR}$  ( $\text{CD}_3\text{CN}$ , 100 MHz):  $\delta$  156.41, 150.72, 148.39, 146.52, 134.33, 134.01, 133.55, 131.64, 131.14, 130.61, 130.53, 130.49, 125.82, 66.06 ppm;  $^{19}\text{F-NMR}$  ( $\text{CD}_3\text{CN}$ , 376 MHz):  $\delta$  -80.47 (s) ppm; HR-FAB-MS ( $m/z$ ): calculated for  $\text{C}_{32}\text{H}_{25}\text{N}_2\text{AsO}_6\text{F}_6\text{S}_2\text{Na}$   $[\text{M}+\text{Na}]^+$ : 809.0172; found: 809.1082.



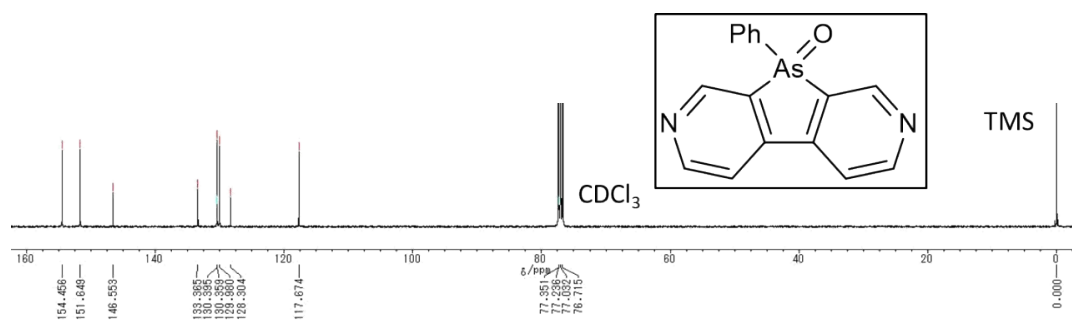

Figure S4.  $^{13}\text{C}$ -NMR spectrum (100 MHz) of **2** in  $\text{CDCl}_3$ .

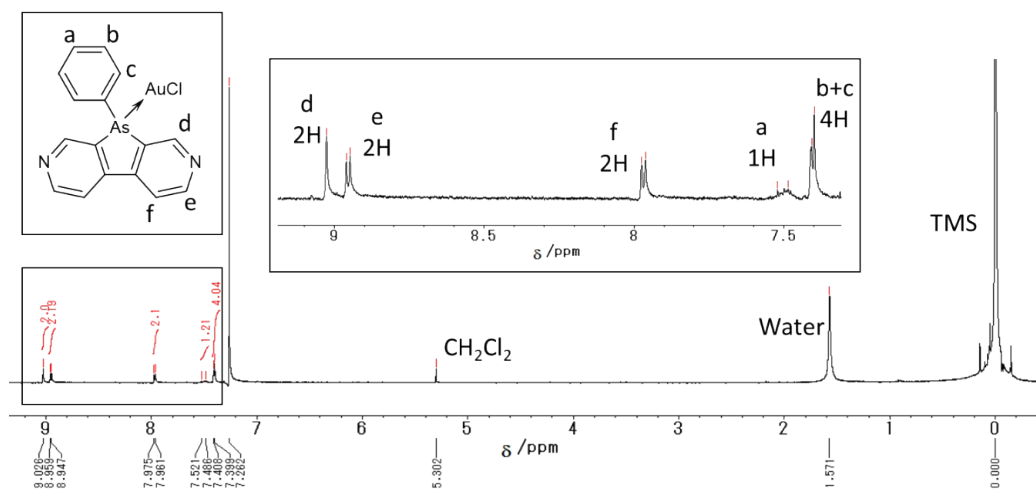

Figure S5.  $^1\text{H}$ -NMR spectrum (400 MHz) of **3** in  $\text{CDCl}_3$ .

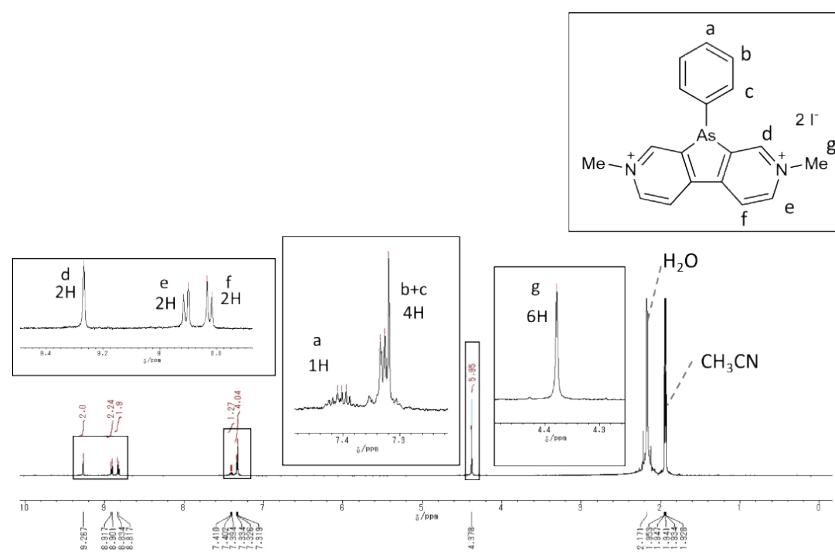

Figure S6.  $^1\text{H}$ -NMR spectrum (400 MHz) of **4-I** in  $\text{CD}_3\text{CN}$ .

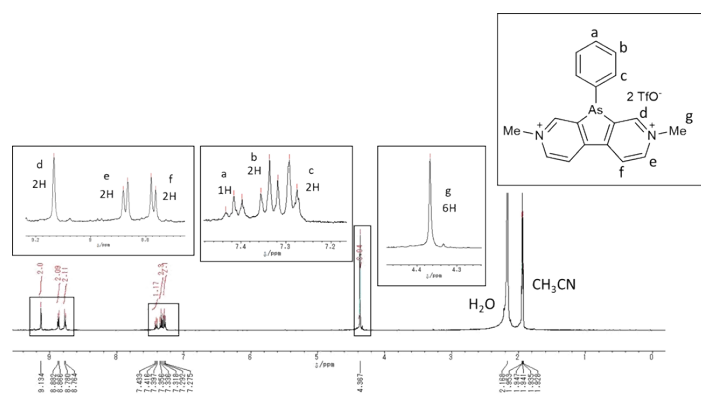

Figure S7.  $^1\text{H-NMR}$  spectrum (400 MHz) of 4-TfO in  $\text{CD}_3\text{CN}$ .

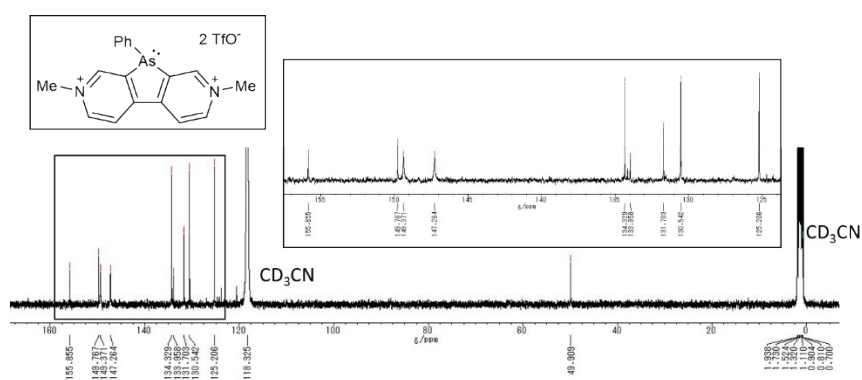

Figure S8.  $^{13}\text{C-NMR}$  spectrum (100 MHz) of 4-TfO in  $\text{CD}_3\text{CN}$ .

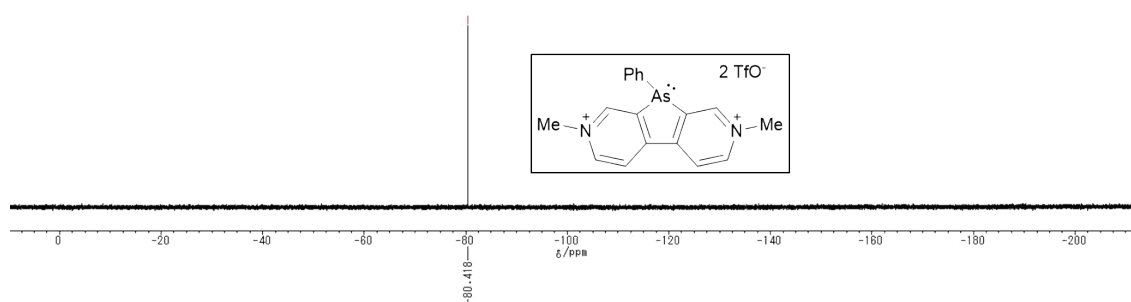

Figure S9.  $^{19}\text{F-NMR}$  spectrum (376 MHz) of 4-TfO in  $\text{CD}_3\text{CN}$ .

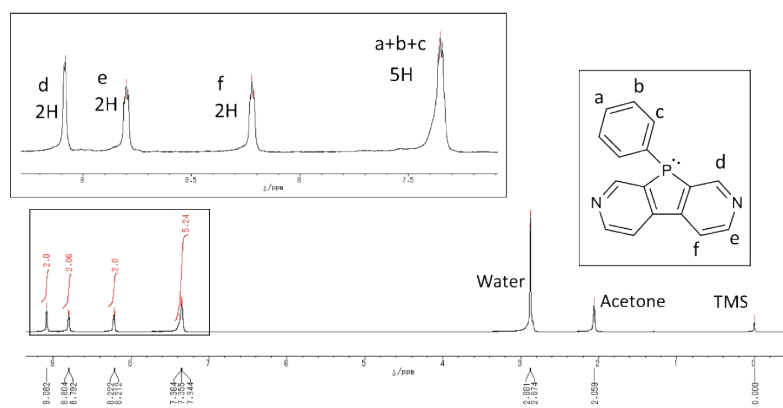

Figure S10.  $^1\text{H-NMR}$  spectrum (400 MHz) of 5 in acetone- $d_6$ .

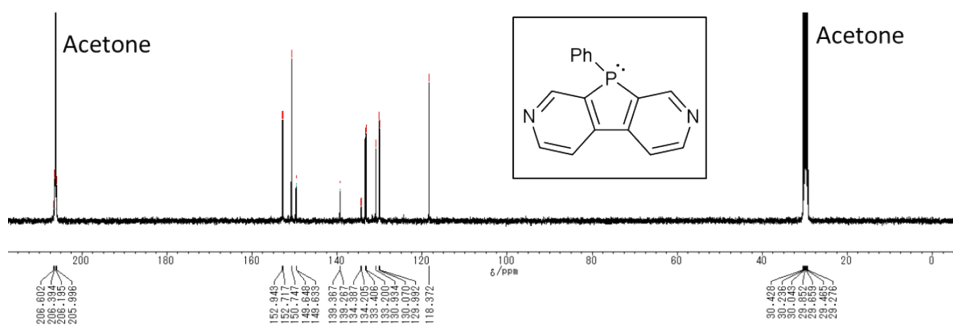

Figure S11.  $^{13}\text{C}$ -NMR spectrum (100 MHz) of **5** in acetone- $d_6$ .

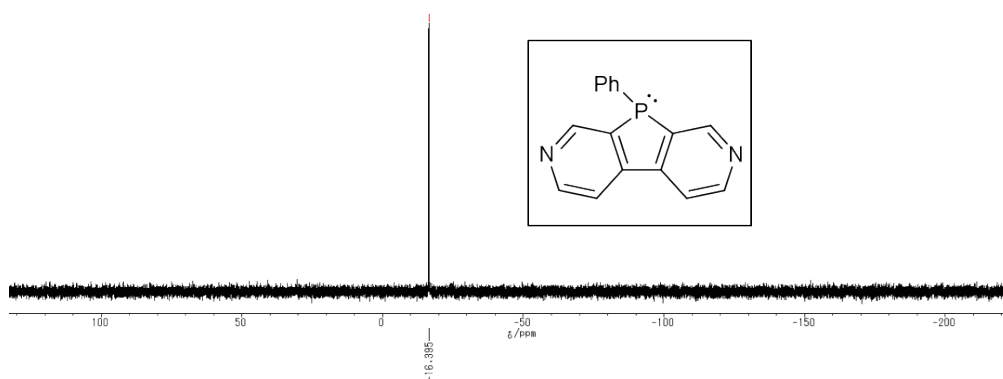

Figure S12.  $^{31}\text{P}$ -NMR spectrum (376 MHz) of **5** in acetone- $d_6$ .

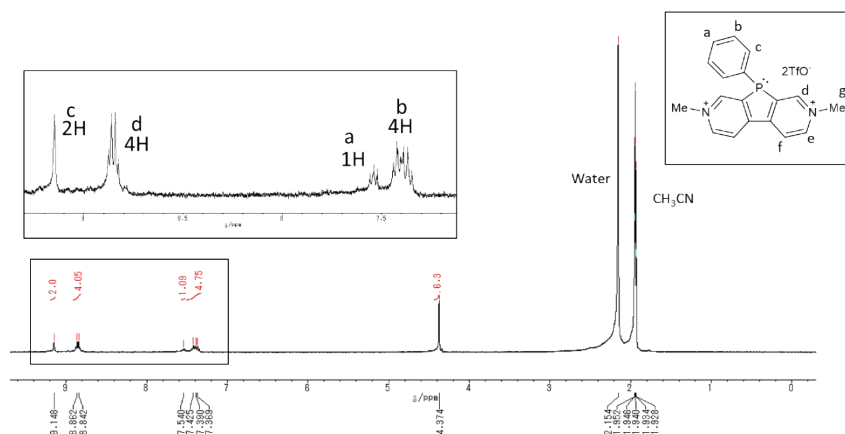

Figure S13.  $^1\text{H}$ -NMR spectrum (400 MHz) of **7** in  $\text{CD}_3\text{CN}$ .

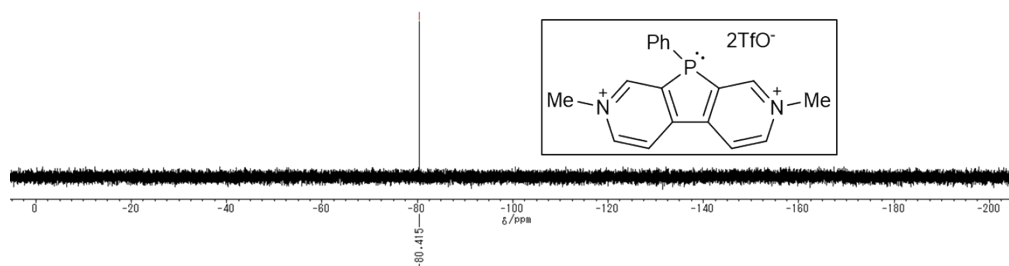

Figure S14.  $^{19}\text{F}$ -NMR spectrum (100 MHz) of **7** in  $\text{CD}_3\text{CN}$ .



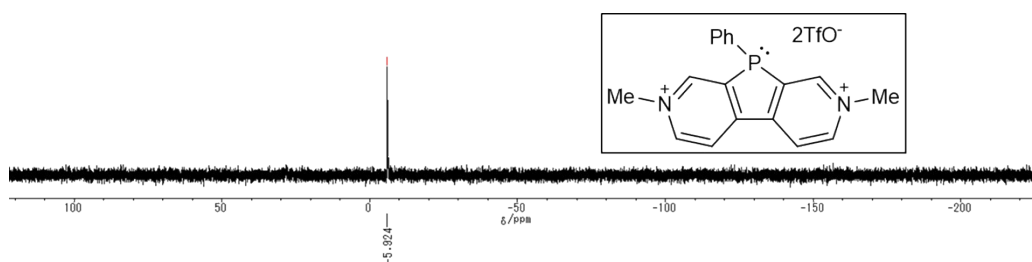

Figure S15.  $^{31}\text{P}$ -NMR spectrum (376 MHz) of **7** in  $\text{CD}_3\text{CN}$ .

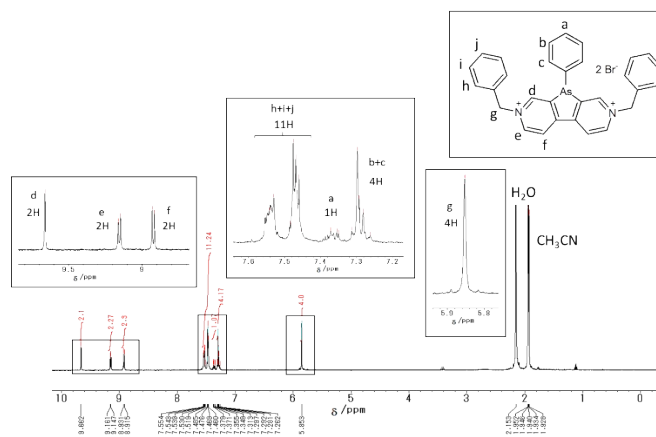

Figure S16.  $^1\text{H}$ -NMR spectrum (400 MHz) of **8-Br** in  $\text{CD}_3\text{CN}$ .

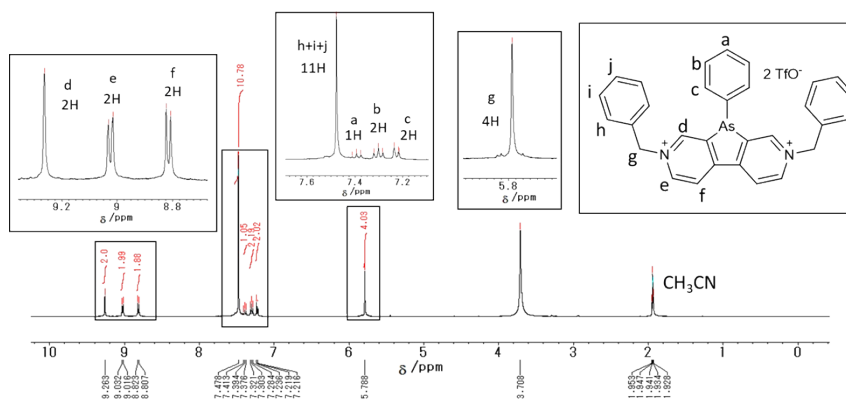

Figure S17.  $^1\text{H}$ -NMR spectrum (400 MHz) of **8-TfO** in  $\text{CD}_3\text{CN}$ .

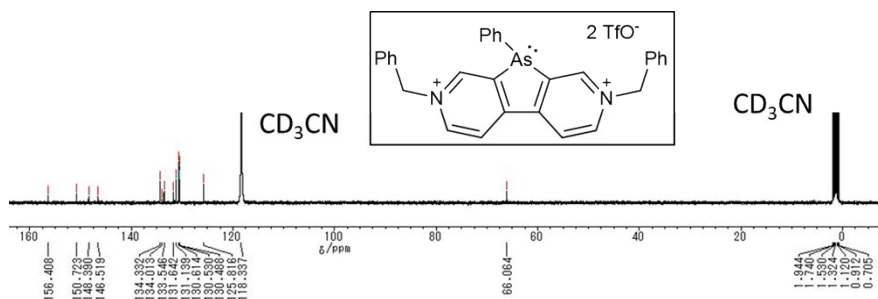

Figure S18.  $^{13}\text{C}$ -NMR spectrum (100 MHz) of **8-TfO** in  $\text{CD}_3\text{CN}$ .

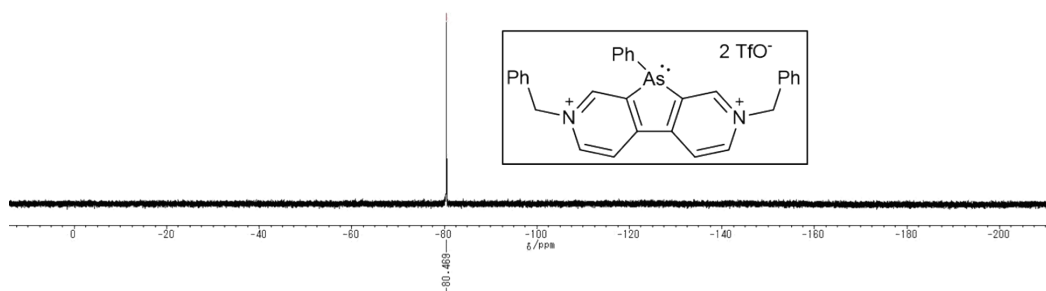

**Figure S19.**  $^{19}\text{F}$ -NMR spectrum (376 MHz) of **8-TfO** in  $\text{CD}_3\text{CN}$ .

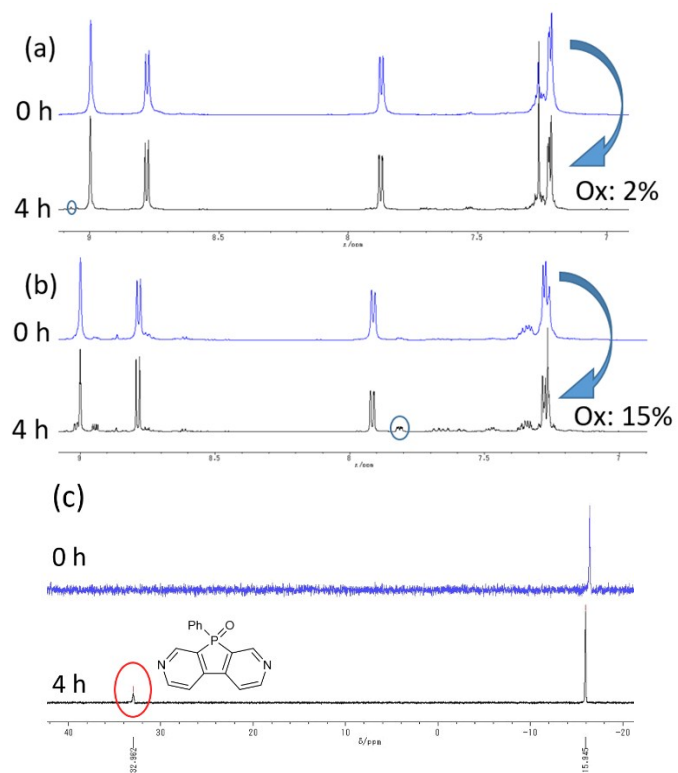

**Figure S20.**  $^1\text{H}$  NMR spectra of (a) **1** and (b) **5** and (c)  $^{31}\text{P}$  NMR spectra of **5** before and after air-bubbling for 4 h in  $\text{CDCl}_3$ . Solid circle indicates the new signal.

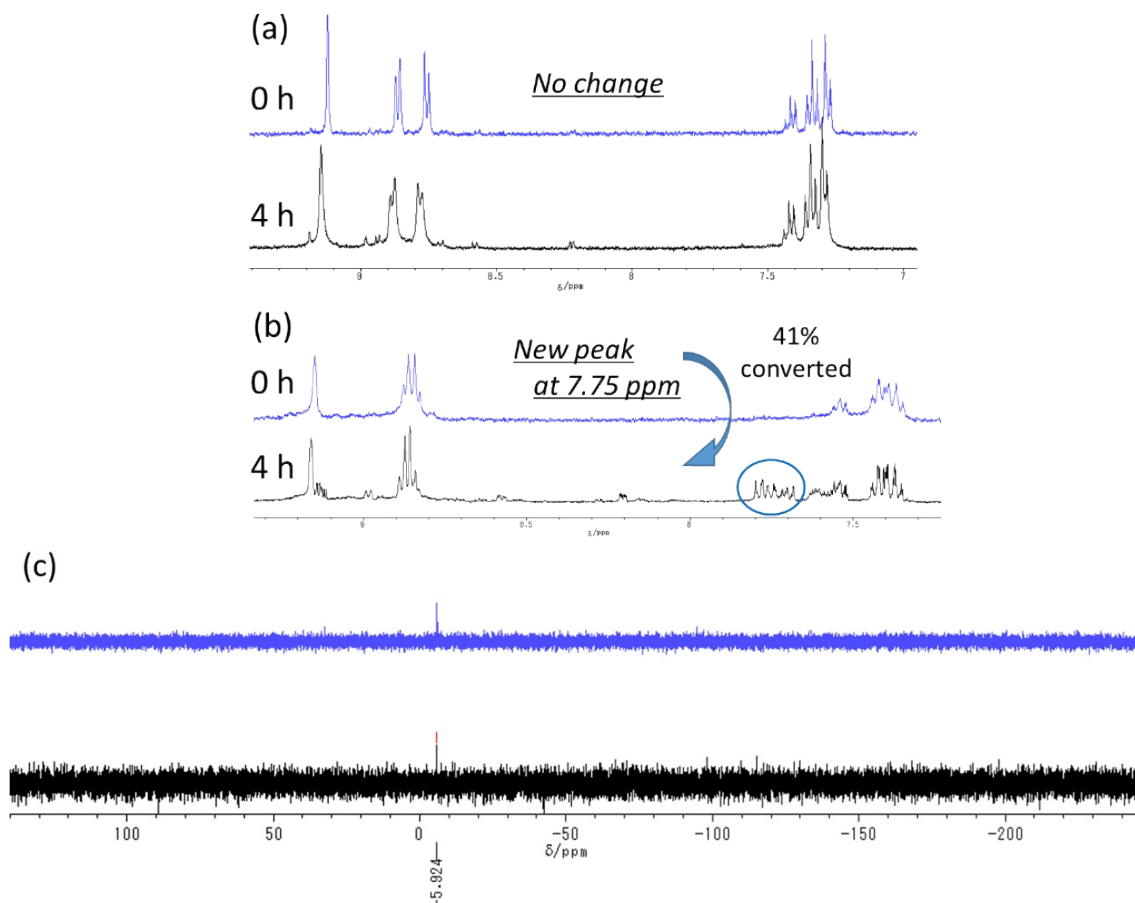

**Figure S21.**  $^1\text{H}$  NMR spectra of (a) 4-TfO and (b) 7 and (c)  $^{31}\text{P}$  NMR spectra of 7 before and after air-bubbling for 4 h in  $\text{CD}_3\text{CN}$ . Solid circle indicates new signals. The conversion of 7 was estimated by using 2-methoxynaphthalene as a standard material.

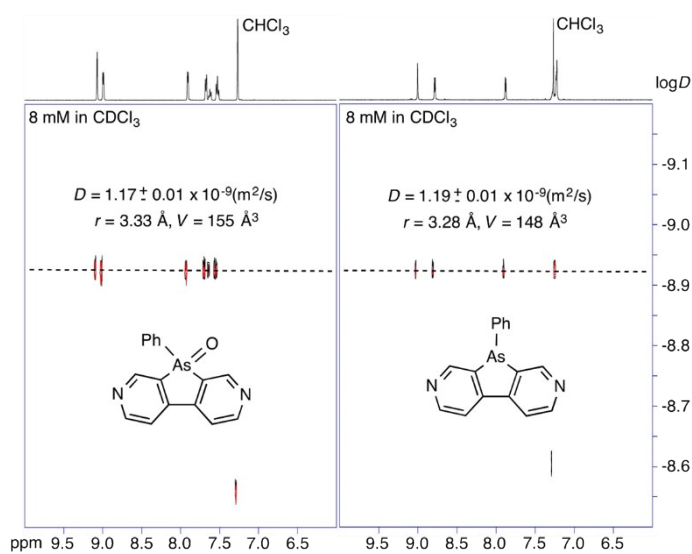

**Figure S22.**  $^1\text{H}$  DOSY spectra (8.0 mM in  $\text{CDCl}_3$ , 298 K, diffusion time  $\Delta = 200$  ms) of 2 (left) and 1 (right). Diffusion coefficient were recorded at 298 K in  $\text{CDCl}_3$  (diffusion time  $\Delta = 200$  ms), and the molecular radii were calculated using the Stokes-Einstein equation.

## 6. Crystallographic data

**Table S1.** Crystallographic data of **1** and **2**.

|                                         | <b>1</b>                                         | <b>2</b>                                                                      |
|-----------------------------------------|--------------------------------------------------|-------------------------------------------------------------------------------|
| Crystal data                            |                                                  |                                                                               |
| Experimental Formula                    | C <sub>16</sub> H <sub>11</sub> AsN <sub>2</sub> | C <sub>32</sub> H <sub>22</sub> As <sub>2</sub> N <sub>4</sub> O <sub>2</sub> |
| Formula Weight                          | 306.20                                           | 644.39                                                                        |
| Crystal Dimension, mm <sup>3</sup>      | 0.200 × 0.200 × 0.200                            | 0.250 X 0.180 X 0.050                                                         |
| Crystal System                          | monoclinic                                       | triclinic                                                                     |
| Space Group                             | P2 <sub>1</sub> /c                               | P-1                                                                           |
| a, Å                                    | 13.672(9)                                        | 8.366(3)                                                                      |
| b, Å                                    | 11.334(8)                                        | 8.971(3)                                                                      |
| c, Å                                    | 8.756(6)                                         | 9.981(4)                                                                      |
| α, deg                                  | -                                                | 70.613(13)                                                                    |
| β, deg                                  | 104.051(9)                                       | 73.295(15)                                                                    |
| γ, deg                                  | -                                                | 74.157(14)                                                                    |
| Volume, Å <sup>3</sup>                  | 1316.2(16)                                       | 663.5(4)                                                                      |
| D <sub>calcd</sub> , g cm <sup>-3</sup> | 1.545                                            | 1.613                                                                         |
| Z                                       | 4                                                | 1                                                                             |
| F(000)                                  | 616.00                                           | 324.00                                                                        |
| Data Collection                         |                                                  |                                                                               |
| Temperature, deg                        | 25.0                                             | 25.0                                                                          |
| 2θmax, deg                              | 54.9                                             | 55.0                                                                          |
| Tmin/Tmax                               | 0.497 – 0.598                                    | 0.742 - 0.880                                                                 |
| Refinement                              |                                                  |                                                                               |
| No. of Observed Data                    | 3012                                             | 3030                                                                          |
| No. of Parameters                       | 172                                              | 181                                                                           |
| R1 <sup>a</sup> , wR2 <sup>b</sup>      | 0.0366, 0.0841                                   | 0.0311, 0.0820                                                                |
| Goodness of Fit Indicator               | 1.070                                            | 1.063                                                                         |

$$^aR1 = \sum ||Fo| - |Fc| | / \sum |Fo| \quad ^b wR2 = [ \sum w ((Fo^2 - Fc^2)^2 / \sum w (Fo^2)^2 )^{1/2} w = [ \sigma^2(Fo^2) ]^{-1}$$

CCDC #1994425 (**1**) and 1994422 (**2**).

**Table S2.** Crystallographic data of **3**, **5**, and **6**.

|                                         | <b>3</b>                                                           | <b>5</b>                                         | <b>6</b>                                          |
|-----------------------------------------|--------------------------------------------------------------------|--------------------------------------------------|---------------------------------------------------|
| Crystal data                            |                                                                    |                                                  |                                                   |
| Experimental Formula                    | C <sub>17</sub> H <sub>13</sub> AsAuCl <sub>3</sub> N <sub>2</sub> | C <sub>16</sub> H <sub>11</sub> N <sub>2</sub> P | C <sub>16</sub> H <sub>11</sub> N <sub>2</sub> OP |
| Formula Weight                          | 623.55                                                             | 262.25                                           | 278.25                                            |
| Crystal Dimension, mm <sup>3</sup>      | 0.320 X 0.160 X 0.130                                              | 0.550 X 0.080 X 0.060                            | 0.280 X 0.260 X 0.150                             |
| Crystal System                          | orthorhombic                                                       | monoclinic                                       | triclinic                                         |
| Space Group                             | Fdd2                                                               | P2 <sub>1</sub> /c                               | P-1                                               |
| a, Å                                    | 16.402(5)                                                          | 13.597(4)                                        | 7.692(4)                                          |
| b, Å                                    | 47.390(13)                                                         | 11.204(3)                                        | 9.588(6)                                          |
| c, Å                                    | 9.844(3)                                                           | 8.645(2)                                         | 10.081(7)                                         |
| α, deg                                  | -                                                                  | -                                                | 88.33(2)                                          |
| β, deg                                  | -                                                                  | 103.655(14)                                      | 72.47(2)                                          |
| γ, deg                                  | -                                                                  | -                                                | 67.903(14)                                        |
| Volume, Å <sup>3</sup>                  | 7652(4)                                                            | 1279.8(6)                                        | 653.9(7)                                          |
| D <sub>calcd</sub> , g cm <sup>-3</sup> | 2.165                                                              | 1.361                                            | 1.413                                             |
| Z                                       | 16                                                                 | 4                                                | 2                                                 |
| F(000)                                  | 4672.00                                                            | 544.00                                           | 288.00                                            |
| Data Collection                         |                                                                    |                                                  |                                                   |
| Temperature, deg                        | 25.0                                                               | 25.0                                             | 25.0                                              |
| 2θmax, deg                              | 54.9                                                               | 55.4                                             | 55.0                                              |
| Tmin/max                                | 0.199 - 0.278                                                      | 0.928 - 0.988                                    | 0.881 - 0.970                                     |
| Refinement                              |                                                                    |                                                  |                                                   |
| No. of Observed Data                    | 4311                                                               | 2995                                             | 2925                                              |
| No. of Parameters                       | 217                                                                | 172                                              | 181                                               |
| R1 <sup>a</sup> , wR2 <sup>b</sup>      | 0.0384, 0.0984                                                     | 0.0666, 0.1913                                   | 0.0411, 0.1105                                    |
| Goodness of Fit Indicator               | 1.020                                                              | 1.054                                            | 1.035                                             |

$$^aR1 = \sum ||Fo| - |Fc| | / \sum |Fo| \quad ^b wR2 = [ \sum w ((Fo^2 - Fc^2)^2 / \sum w (Fo^2)^2 )^{1/2} w = [ \sigma^2(Fo^2) ]^{-1}$$

CCDC #1994426 (**3**), 1994424 (**5**), and 1994423 (**6**).

**Table S3.** ORTEP drawing (ellipsoids at 50% probability), selected angles (deg) and distances (Å) of **1**.

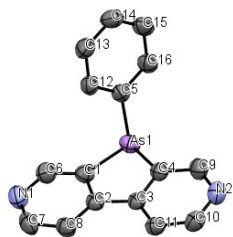

| interplanar angle (°)      |          | angle (°)       |          |
|----------------------------|----------|-----------------|----------|
| C(1)C(2)C(8)C(7)N(1)C(6)-  |          | C(1)-As(1)-C(4) | 85.2(1)  |
| C(4)C(3)C(11)C(10)N(2)C(9) | 2.34     | C(1)-As(1)-C(5) | 101.5(1) |
|                            |          | C(4)-As(1)-C(5) | 101.3(1) |
| <b>distance (Å)</b>        |          | As(1)-C(1)-C(6) | 128.7(2) |
| As(1)-C(1)                 | 1.942(3) | As(1)-C(4)-C(9) | 129.2(2) |
| As(1)-C(4)                 | 1.943(3) | As(1)-C(1)-C(2) | 112.7(2) |
| As(1)-C(5)                 | 1.953(3) | As(1)-C(4)-C(3) | 112.5(2) |
| C(1)-C(2)                  | 1.399(3) | C(1)-C(2)-C(3)  | 114.3(2) |
| C(2)-C(3)                  | 1.469(4) | C(2)-C(3)-C(4)  | 114.7(2) |
| C(3)-C(4)                  | 1.395(4) | C(1)-C(2)-C(8)  | 118.2(2) |
|                            |          | C(2)-C(1)-C(6)  | 118.4(2) |
|                            |          | C(4)-C(3)-C(11) | 118.6(2) |
|                            |          | C(3)-C(4)-C(9)  | 118.0(2) |
|                            |          | C(2)-C(3)-C(11) | 126.7(2) |
|                            |          | C(3)-C(2)-C(8)  | 127.5(2) |

**Table S4.** ORTEP drawing (ellipsoids at 50% probability), selected angles (deg) and distances (Å) of **2**.

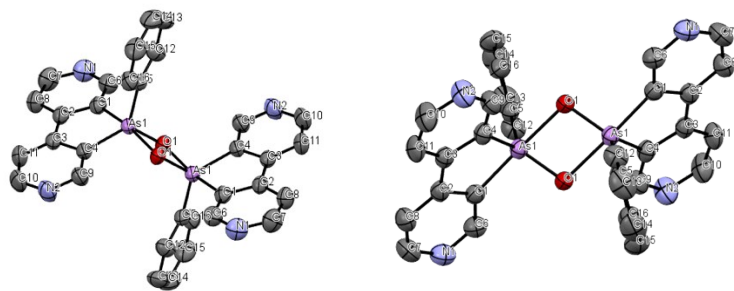

| interplanar angle (°)      |          | angle (°)        |           |
|----------------------------|----------|------------------|-----------|
| C(1)C(2)C(8)C(7)N(1)C(6)-  |          | C(1)-As(1)-C(4)  | 85.9(1)   |
| C(4)C(3)C(11)C(10)N(2)C(9) | 5.49     | C(1)-As(1)-C(5)  | 100.9(1)  |
| distance (Å)               |          | C(4)-As(1)-C(5)  | 113.3(1)  |
| As(1)-C(1)                 | 1.966(3) | As(1)-C(1)-C(6)  | 129.7(2)  |
| As(1)-C(4)                 | 1.936(2) | As(1)-C(4)-C(9)  | 128.2(2)  |
| As(1)-C(5)                 | 1.923(3) | As(1)-C(1)-C(2)  | 111.7(2)  |
| C(1)-C(2)                  | 1.398(3) | As(1)-C(4)-C(3)  | 112.4(2)  |
| C(2)-C(3)                  | 1.484(4) | C(1)-C(2)-C(3)   | 114.4(2)  |
| C(3)-C(4)                  | 1.395(5) | C(2)-C(3)-C(4)   | 115.3(2)  |
| As(1)-O(1)                 | 2.100(2) | C(1)-C(2)-C(8)   | 119.2(3)  |
|                            | 1.706(2) | C(2)-C(1)-C(6)   | 118.5(3)  |
|                            |          | C(4)-C(3)-C(11)  | 118.1(3)  |
|                            |          | C(3)-C(4)-C(9)   | 119.5(3)  |
|                            |          | C(2)-C(3)-C(11)  | 126.5(3)  |
|                            |          | C(8)-C(2)-C(3)   | 127.5(2)  |
|                            |          | O(1)-As(1)-C(1)  | 171.87(9) |
|                            |          |                  | 98.8(1)   |
|                            |          | O(1)-As(1)-C(4)  | 88.74(9)  |
|                            |          |                  | 126.3(1)  |
|                            |          | O(1)-As(1)-C(5)  | 86.87(9)  |
|                            |          |                  | 118.1(1)  |
|                            |          | As(1)-O(1)-As(1) | 100.44(8) |
|                            |          | O(1)-As(1)-O(1)  | 79.56(8)  |

**Table S5.** ORTEP drawing (ellipsoids at 50% probability), selected angles (deg) and distances (Å) of **3**.

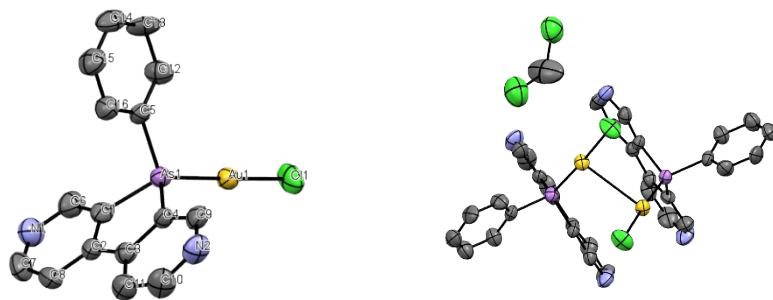

| interplanar angle (°)                                   |      | angle (°)         |          |
|---------------------------------------------------------|------|-------------------|----------|
| C(1)C(2)C(8)C(7)N(1)C(6)-<br>C(4)C(3)C(11)C(10)N(2)C(9) | 3.96 | C(1)-As(1)-C(4)   | 87.6(5)  |
|                                                         |      | C(1)-As(1)-C(5)   | 106.8(5) |
|                                                         |      | C(4)-As(1)-C(5)   | 107.0(4) |
|                                                         |      | As(1)-C(1)-C(6)   | 128.4(9) |
|                                                         |      | As(1)-C(4)-C(9)   | 129.4(9) |
|                                                         |      | As(1)-C(1)-C(2)   | 110.3(8) |
|                                                         |      | As(1)-C(4)-C(3)   | 110.9(7) |
|                                                         |      | C(1)-C(2)-C(3)    | 117(1)   |
|                                                         |      | C(2)-C(3)-C(4)    | 114.5(9) |
|                                                         |      | C(1)-C(2)-C(8)    | 117(1)   |
|                                                         |      | C(2)-C(1)-C(6)    | 121(1)   |
|                                                         |      | C(4)-C(3)-C(11)   | 119(1)   |
|                                                         |      | C(3)-C(4)-C(9)    | 120(1)   |
|                                                         |      | C(2)-C(3)-C(11)   | 127(1)   |
|                                                         |      | C(3)-C(2)-C(8)    | 126(1)   |
|                                                         |      | As(1)-Au(1)-Cl(1) | 176.9(1) |
|                                                         |      | Au(1)-Au(1)-Cl(1) | 90.1(1)  |
|                                                         |      | Au(1)-Au(1)-As(1) | 92.88(3) |

**Table S6.** ORTEP drawing (ellipsoids at 50% probability), selected angles (deg) and distances (Å) of **5**.

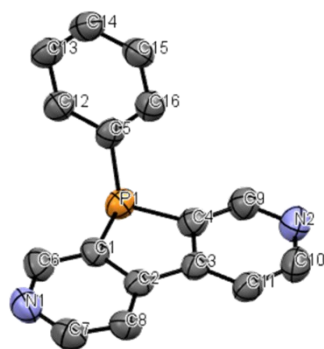

| interplanar angle (°)      |          | angle (°)       |          |
|----------------------------|----------|-----------------|----------|
| C(1)C(2)C(8)C(7)N(1)C(6)-  |          | C(1)-P(1)-C(4)  | 89.1(1)  |
| C(4)C(3)C(11)C(10)N(2)C(9) | 1.97     | C(1)-P(1)-C(5)  | 103.3(1) |
| <hr/>                      |          | C(4)-P(1)-C(5)  | 104.0(1) |
| distance (Å)               |          | P(1)-C(1)-C(6)  | 129.0(3) |
| P(1)-C(1)                  | 1.813(4) | P(1)-C(4)-C(9)  | 130.1(3) |
| P(1)-C(4)                  | 1.799(3) | P(1)-C(1)-C(2)  | 112.5(2) |
| P(1)-C(5)                  | 1.824(3) | P(1)-C(4)-C(3)  | 112.6(2) |
| C(1)-C(2)                  | 1.385(5) | C(1)-C(2)-C(3)  | 112.9(3) |
| C(2)-C(3)                  | 1.459(4) | C(2)-C(3)-C(4)  | 112.5(3) |
| C(3)-C(4)                  | 1.399(5) | C(1)-C(2)-C(8)  | 119.2(3) |
|                            |          | C(2)-C(1)-C(6)  | 118.3(3) |
|                            |          | C(4)-C(3)-C(11) | 118.9(3) |
|                            |          | C(3)-C(4)-C(9)  | 117.0(3) |
|                            |          | C(2)-C(3)-C(11) | 128.6(3) |
|                            |          | C(3)-C(2)-C(8)  | 127.9(3) |



**Table S7.** ORTEP drawing (ellipsoids at 50% probability), distances (Å) and selected angles (deg) of **6**.

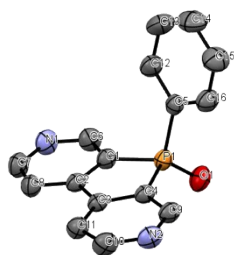

| interplanar angle (°)      |          | angle (°)       |           |
|----------------------------|----------|-----------------|-----------|
| C(1)C(2)C(8)C(7)N(1)C(6)-  |          | C(1)-P(1)-C(4)  | 91.37(7)  |
| C(4)C(3)C(11)C(10)N(2)C(9) | 3.00     | C(1)-P(1)-C(5)  | 107.43(7) |
|                            |          | C(4)-P(1)-C(5)  | 105.58(8) |
| distance (Å)               |          | P(1)-C(1)-C(6)  | 130.5(1)  |
| P(1)-C(1)                  | 1.811(2) | P(1)-C(4)-C(9)  | 130.2(1)  |
| P(1)-C(4)                  | 1.810(2) | P(1)-C(1)-C(2)  | 111.0(1)  |
| P(1)-C(5)                  | 1.797(2) | P(1)-C(4)-C(3)  | 111.1(1)  |
| C(1)-C(2)                  | 1.403(2) | C(1)-C(2)-C(3)  | 113.4(1)  |
| C(2)-C(3)                  | 1.481(2) | C(2)-C(3)-C(4)  | 113.2(1)  |
| C(3)-C(4)                  | 1.405(3) | C(1)-C(2)-C(8)  | 119.0(2)  |
| P(1)-O(1)                  | 1.480(1) | C(2)-C(1)-C(6)  | 118.6(2)  |
|                            |          | C(4)-C(3)-C(11) | 119.1(2)  |
|                            |          | C(3)-C(4)-C(9)  | 118.7(2)  |
|                            |          | C(2)-C(3)-C(11) | 127.7(2)  |
|                            |          | C(3)-C(2)-C(8)  | 127.6(2)  |
|                            |          | O(1)-P(1)-C(1)  | 117.55(8) |
|                            |          | O(1)-P(1)-C(4)  | 117.16(8) |
|                            |          | O(1)-P(1)-C(5)  | 114.85(8) |

## 7. Optical properties

**Table S8.** Optical properties of **1**, **2**, **5**, and **6**.<sup>a</sup>

|          | $\lambda_{\text{abs}}^b$<br>[nm] | $\lambda_{\text{ex}}^c$<br>[nm] | $\lambda_{\text{em}}^d$<br>[nm] | $\tau^g$<br>[ $\mu\text{s}$ ] | $\Phi_{\text{PL}}$ |
|----------|----------------------------------|---------------------------------|---------------------------------|-------------------------------|--------------------|
| <b>1</b> | 302                              | 297                             | 497                             | 7.99                          | ND <sup>i</sup>    |
| <b>2</b> | 272 <sup>e</sup>                 | 258 <sup>h</sup>                | 437 <sup>h</sup>                | 7.88                          | ND <sup>i</sup>    |
| <b>5</b> | 322                              | 260                             | 488                             | 7.45                          | 0.12               |
| <b>6</b> | 275 <sup>f</sup>                 | 257                             | 444                             | 7.86                          | ND <sup>i</sup>    |

<sup>a</sup>Measured in  $\text{CHCl}_3$  ( $10^{-4}$  M). <sup>b</sup>Longest absorption maximum. <sup>c</sup>Excitation maximum (emission at the  $\lambda_{\text{em}}$ ). <sup>d</sup>Emission maximum (excitation at the  $\lambda_{\text{ex}}$ ). <sup>e</sup>Measured in  $2 \times 10^{-5}$  M. <sup>f</sup>Measured in  $10^{-5}$  M. <sup>g</sup>Excited at 280 nm. <sup>h</sup>Measured in  $2 \times 10^{-4}$  M. <sup>i</sup>Not determined.

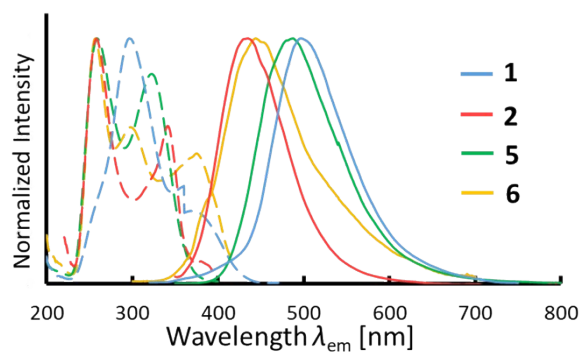

**Figure S23.** Emission and excitation spectra of **1**, **2**, **5** and **6** in the solid-state at 77K.

**Table S9.** Optical properties of **1**, **2**, **5**, and **6** in the solid state at 77K.

|          | $\lambda_{\text{ex}}$ [nm] <sup>a</sup> | $\lambda_{\text{em}}$ [nm] <sup>b</sup> | $\Phi^c$ |
|----------|-----------------------------------------|-----------------------------------------|----------|
| <b>1</b> | 353                                     | 487                                     | 0.10     |
| <b>2</b> | 310                                     | 515                                     | 0.14     |
| <b>5</b> | 355                                     | 456                                     | 0.14     |
| <b>6</b> | 312                                     | 498                                     | 0.16     |

<sup>a</sup>Excitation maximum (emission at the  $\lambda_{\text{em}}$ ). <sup>b</sup>Emission maximum (excitation at the  $\lambda_{\text{ex}}$ ). <sup>c</sup>Absolute quantum yield.

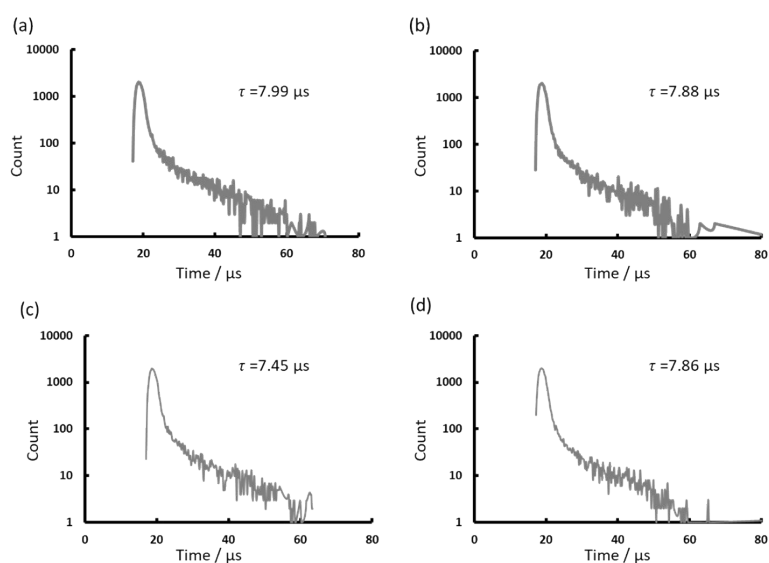

**Figure S24.** The emission decay kinetics of (a) **1** (b) **2**, (c) **5**, and (d) **6** in  $\text{CHCl}_3$  (**1**, **5**, **6**:  $10^{-4}$  M, **2**:  $2 \times 10^{-4}$  M) on excitation at 280 nm (monitoring:  $\lambda_{\text{em}}$  shown in Table S8).

## 8. Cyclic voltammetric analysis

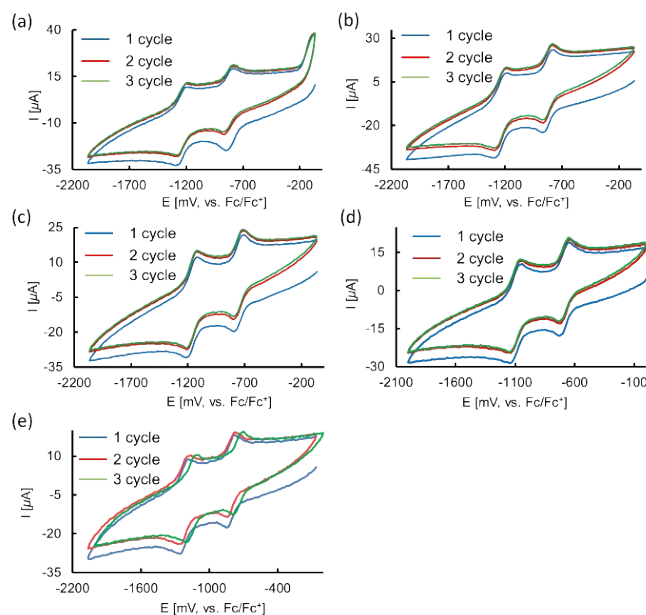

**FigureS25.** Cyclic voltammograms of (a) **4-I**, (b) **4-TfO**, (c) **8-Br**, (d) **8-TfO**, and (e) **7** for 3 cycles (solvent: DMF (1 mM) under  $\text{N}_2$ , supporting electrolyte:  $\text{NBu}_4\text{PF}_6$  (0.1 M), scan rate: 100 mV/s, working electrode: glassy carbon, counter electrode: platinum wire). Potential  $E$  was referenced to  $\text{Fc}/\text{Fc}^+$ .

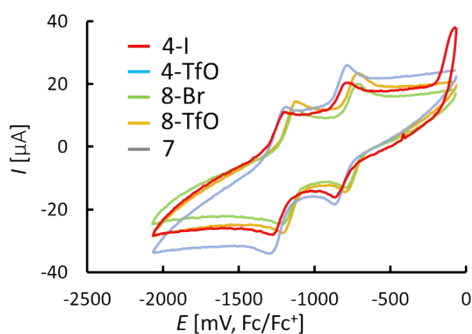

**Figure S26.** Cyclic voltammograms of **4-I**, **4-TfO**, **8-Br**, **8-TfO**, and **7** (solvent: DMF (1 mM) under  $\text{N}_2$ , supporting electrolyte:  $\text{NBu}_4\text{PF}_6$  (0.1 M), scan rate: 100 mV/s, working electrode: glassy carbon, counter electrode: platinum wire). Potential  $E$  was referenced to  $\text{Fc}/\text{Fc}^+$ .

**Table S10.** Reduction potential ( $E_{\text{red}}$ ) of **4**, **8**, and **7**.

|              | $E_{\text{red1,c}}$<br>[mV] <sup>a</sup> | $E_{\text{red2,c}}$<br>[mV] <sup>a</sup> |
|--------------|------------------------------------------|------------------------------------------|
| <b>4-I</b>   | -865                                     | -1275                                    |
| <b>4-TfO</b> | -865                                     | -1295                                    |
| <b>8-Br</b>  | -790                                     | -1210                                    |
| <b>8-TfO</b> | -805                                     | -1215                                    |
| <b>7</b>     | -855                                     | -1255                                    |

<sup>a</sup>CV in DMF ( $10^{-3}$  M) with  $\text{NBu}_4\text{NPF}_6$  (0.1 M), as referred to  $\text{Fc}/\text{Fc}^+$ .

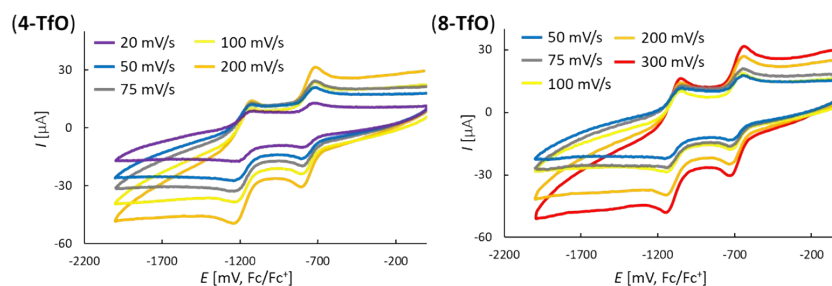

**Figure S27.** Cyclic voltammograms of **4-TfO** and **8-TfO** at different scan rates (solvent: DMF (1 mM) under  $\text{N}_2$ , supporting electrolyte:  $\text{NBu}_4\text{PF}_6$  (0.1 M)).

**Table S11.** Diffusion coefficient of **4-TfO** and **8-TfO**.<sup>8</sup>

|              | D [ $10^{-3} \text{ cm}^2 \text{ s}^{-1}$ ] |
|--------------|---------------------------------------------|
| <b>4-TfO</b> | 3.37                                        |
| <b>8-TfO</b> | 2.17                                        |

## 9. Spectroelectrochemistry

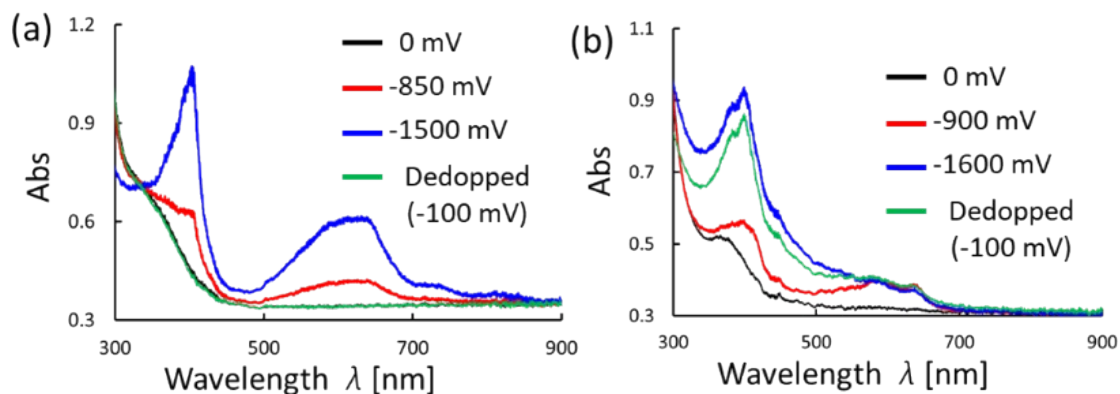

**Figure S28.** Spectroelectrochemistry of (a) **4-TfO** and (b) **7** (solvent: DMF (1 g/L), supporting electrolyte:  $\text{NBu}_4\text{PF}_6$  (0.1 M), working electrode: Pt mesh, counter electrode: platinum wire).

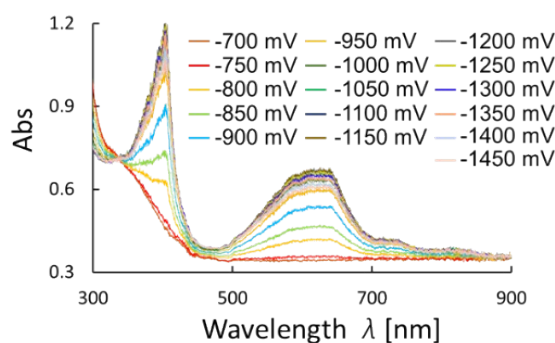

**Figure S29.** Spectroelectrochemistry of **4-TfO** (solvent: DMF (1 g/L), supporting electrolyte:  $\text{NBu}_4\text{PF}_6$  (0.1 M), working electrode: Pt mesh, counter electrode: platinum wire).

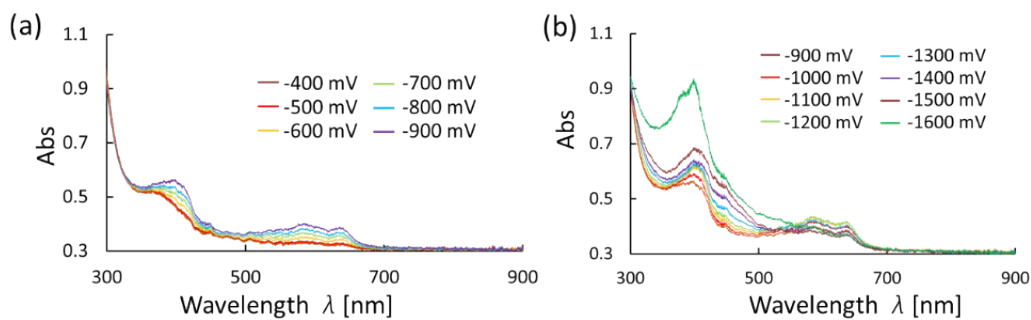

**Figure S30.** Spectroelectrochemistry of **7** for (a) the first reduction and (b) the second reduction (solvent: DMF (1 g/L), supporting electrolyte:  $\text{NBu}_4\text{PF}_6$  (0.1 M) working electrode: Pt mesh, counter electrode: platinum wire).

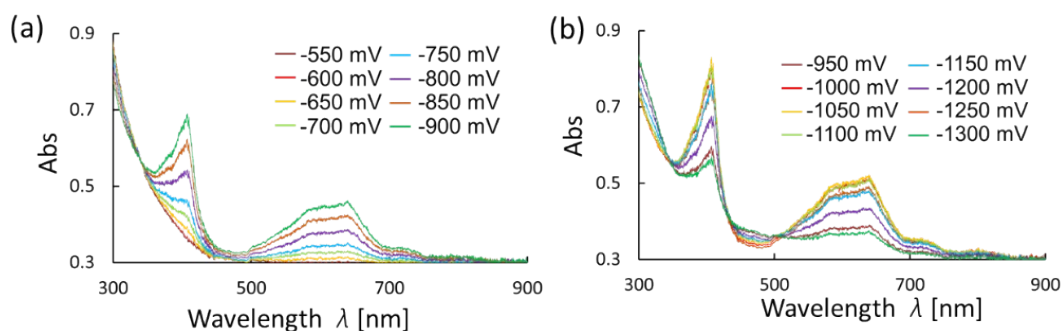

**Figure S31.** Spectroelectrochemistry of **8-TfO** for (a) the first reduction and (b) the second reduction (solvent: DMF (1 g/L), supporting electrolyte:  $\text{NBu}_4\text{PF}_6$  (0.1 M) working electrode: Pt mesh, counter electrode: platinum wire).

## 10. Theoretical calculation

### Computational methods

Density functional theory (DFT) calculations were carried out to investigate the frontier orbitals of the synthesized compounds. In addition, the vertical excitation energies ( $\Delta E$ ) and oscillator strengths ( $f$ ) were obtained for the three lowest  $S_0 \rightarrow S_1$  transitions at the optimized ground state equilibrium geometries by using the time-dependent density functional theory (TD-DFT). These calculations employed B3LYP/6-31G+(d,p). Also, natural bonding orbital (NBO) analysis was performed by B3LYP/6-1G+(d,p).<sup>10</sup> Nucleus-independent chemical shift (NICS) values were calculated by GIAO-B3LYP/6-311G+(d,p) based on the optimized structures shown in Tables S13 and S18.<sup>11</sup> NICS(1)<sub>zz</sub> values were employed for the evaluation of aromaticity; the ring centers of the arsole rings were determined by the average of the coordinates of atoms 1-5 in Tables S13 and S18. For the open-shell systems (radical cation species), unrestricted Kohn-Sham (UKS) calculations have been performed. No spin contamination has been found for the open shell system being the  $\langle S^2 \rangle$  value equal to 0.75. When we conducted calculations for viologen-analogues in DMF, the Polarized Continuum Model (PCM)<sup>9</sup> as a self-consistent reaction field (SCRF) was used. For all the calculation, Gaussian 09 code was employed.<sup>12</sup>

**Table S12.** WBI of **1**, **2**, **5**, and **6**.<sup>a</sup>

|       | <b>1</b> | <b>2</b> | <b>5</b> | <b>6</b> |
|-------|----------|----------|----------|----------|
| C1-C2 | 1.3521   | 1.3677   | 1.3446   | 1.3456   |
| C2-C3 | 1.0698   | 1.0471   | 1.0733   | 1.0546   |
| C3-C4 | 1.3508   | 1.3589   | 1.3332   | 1.3476   |

<sup>a</sup> Level of theory: B3LYP/6-31G+(d,p). Geometries were based on their structures measured by single crystal X-ray diffraction analysis.

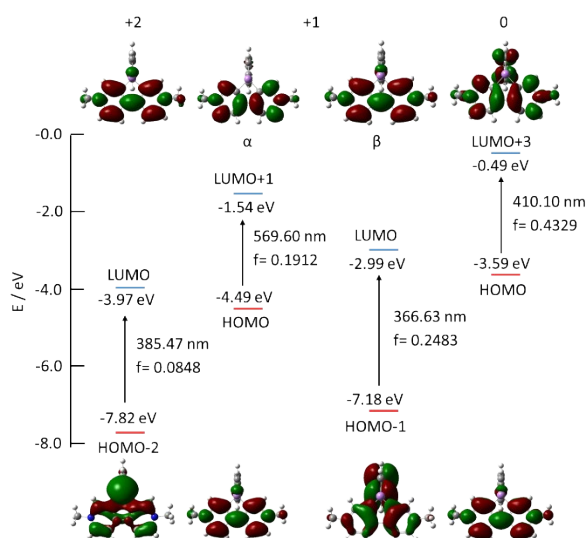

**Figure S32.** Frontier orbitals of **4** by DFT calculations (B3LYP/6-31G+(d,p)).

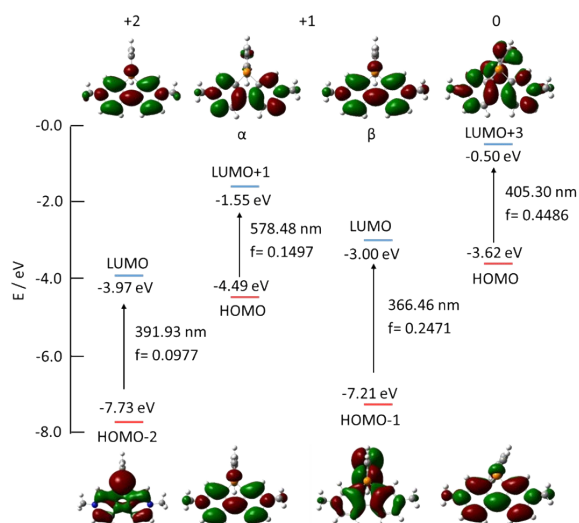

**Figure S33.** Frontier orbitals of **7** by DFT calculations (B3LYP/6-31G+(d,p)).

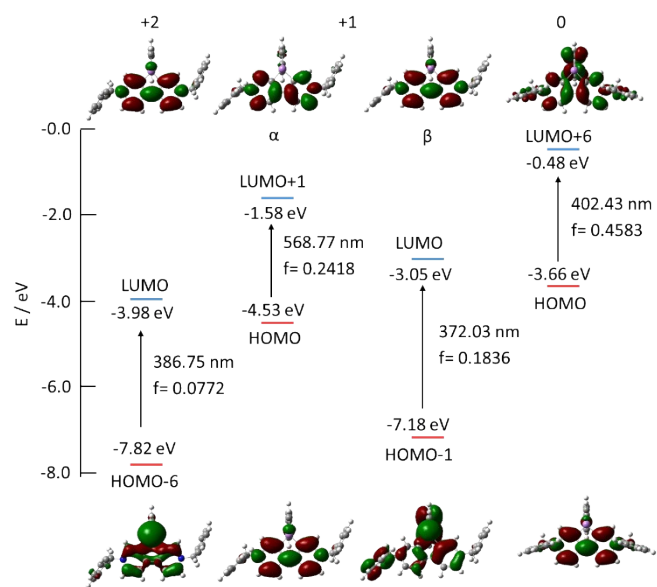

**Figure S34.** Frontier orbitals of 8 by DFT calculations (B3LYP/6-31G+(d,p)).

**Table S13.** Atom coordinates and absolute energy levels for **1** optimized in the  $S_0$  state.**1** ( $S_0$  state):  $E(\text{B3LYP}) = -2959.68061579$  A.U.

| Center Number | Atomic Number | Atomic Type | Coordinate |          |          |
|---------------|---------------|-------------|------------|----------|----------|
|               |               |             | X          | Y        | Z        |
| 1             | 33            | 0           | 0.357415   | 0.000024 | 1.319846 |
| 2             | 7             | 0           | -1.58353   | -3.52835 | -0.08281 |
| 3             | 7             | 0           | -1.58345   | 3.528404 | -0.08301 |
| 4             | 6             | 0           | 1.924837   | -6.7E-05 | 0.137043 |
| 5             | 6             | 0           | -1.85708   | -0.73712 | -0.25431 |
| 6             | 6             | 0           | -1.85705   | 0.737173 | -0.25436 |
| 7             | 6             | 0           | -0.77473   | 1.321294 | 0.433166 |
| 8             | 6             | 0           | -0.69982   | -2.71136 | 0.508096 |
| 9             | 6             | 0           | -2.60111   | -2.9618  | -0.74967 |
| 10            | 6             | 0           | -2.79022   | -1.58338 | -0.86223 |
| 11            | 6             | 0           | -0.6997    | 2.711424 | 0.507868 |
| 12            | 6             | 0           | -2.6011    | 2.961843 | -0.74974 |
| 13            | 6             | 0           | -2.79022   | 1.583412 | -0.86225 |
| 14            | 6             | 0           | 3.189052   | 0.000193 | 0.737947 |
| 15            | 6             | 0           | 4.348554   | 0.000192 | -0.04538 |
| 16            | 6             | 0           | 4.249694   | -6.4E-05 | -1.43776 |
| 17            | 6             | 0           | 2.988806   | -0.00033 | -2.04526 |
| 18            | 6             | 0           | 1.835589   | -0.00032 | -1.26041 |
| 19            | 6             | 0           | -0.77482   | -1.32123 | 0.433316 |
| 20            | 1             | 0           | 0.108163   | -3.19898 | 1.050082 |
| 21            | 1             | 0           | -3.30483   | -3.64863 | -1.21456 |
| 22            | 1             | 0           | -3.64527   | -1.19588 | -1.40785 |
| 23            | 1             | 0           | 0.108323   | 3.199065 | 1.049775 |
| 24            | 1             | 0           | -3.30488   | 3.648656 | -1.21455 |
| 25            | 1             | 0           | -3.64536   | 1.195902 | -1.40772 |
| 26            | 1             | 0           | 3.27358    | 0.000364 | 1.821705 |
| 27            | 1             | 0           | 5.323713   | 0.000386 | 0.433229 |
| 28            | 1             | 0           | 5.148173   | -6.6E-05 | -2.04808 |
| 29            | 1             | 0           | 2.905494   | -0.00055 | -3.12842 |
| 30            | 1             | 0           | 0.862925   | -0.00055 | -1.74415 |



**Table S14.** Atom coordinates and absolute energy levels for **2** optimized in the  $S_0$  state.**2** ( $S_0$  state):  $E(\text{B3LYP}) = -3034.88140751$  A.U.

| Center Number | Atomic Number | Atomic Type | Coordinate |          |          |
|---------------|---------------|-------------|------------|----------|----------|
|               |               |             | X          | Y        | Z        |
| 1             | 6             | 0           | 0.77124    | -2.73099 | 0.352906 |
| 2             | 7             | 0           | 1.719351   | -3.53713 | -0.14969 |
| 3             | 6             | 0           | 2.776919   | -2.95744 | -0.73399 |
| 4             | 6             | 0           | 2.956319   | -1.57476 | -0.84159 |
| 5             | 6             | 0           | 1.966576   | -0.74162 | -0.31699 |
| 6             | 6             | 0           | 0.841823   | -1.34432 | 0.272953 |
| 7             | 6             | 0           | 1.965841   | 0.743225 | -0.31661 |
| 8             | 6             | 0           | 0.84056    | 1.344501 | 0.273778 |
| 9             | 33            | 0           | -0.36701   | -0.0007  | 0.978131 |
| 10            | 6             | 0           | 2.954641   | 1.577568 | -0.84107 |
| 11            | 6             | 0           | 2.773693   | 2.96002  | -0.73314 |
| 12            | 7             | 0           | 1.715656   | 3.538394 | -0.14838 |
| 13            | 6             | 0           | 0.768536   | 2.731068 | 0.354201 |
| 14            | 8             | 0           | -0.65034   | -0.00155 | 2.604606 |
| 15            | 6             | 0           | -1.99233   | -0.00082 | -0.05756 |
| 16            | 6             | 0           | -1.97677   | -0.00046 | -1.45564 |
| 17            | 6             | 0           | -3.17899   | -0.00013 | -2.16361 |
| 18            | 6             | 0           | -4.3955    | -0.00038 | -1.47199 |
| 19            | 6             | 0           | -4.40875   | -0.00093 | -0.07445 |
| 20            | 6             | 0           | -3.20517   | -0.00083 | 0.636076 |
| 21            | 1             | 0           | -0.0731    | -3.22411 | 0.828586 |
| 22            | 1             | 0           | 3.527943   | -3.63486 | -1.13409 |
| 23            | 1             | 0           | 3.848613   | -1.18    | -1.31691 |
| 24            | 1             | 0           | 3.847174   | 1.183923 | -1.31687 |
| 25            | 1             | 0           | 3.523951   | 3.638382 | -1.13309 |
| 26            | 1             | 0           | -0.07633   | 3.223144 | 0.830034 |
| 27            | 1             | 0           | -1.03519   | -0.00017 | -1.99812 |
| 28            | 1             | 0           | -3.16805   | 0.000417 | -3.24952 |
| 29            | 1             | 0           | -5.33121   | -0.00028 | -2.02346 |
| 30            | 1             | 0           | -5.35254   | -0.00107 | 0.462749 |
| 31            | 1             | 0           | -3.19411   | -0.00086 | 1.722342 |

**Table S15.** Atom coordinates and absolute energy levels for  $4^{2+}$  optimized in the  $S_0$  state.

---

$4^{2+}$  ( $S_0$  state):  $E(\text{B3LYP}) = -3039.20085508$  A.U.

---

| Center Number | Atomic Number | Atomic Type | coordinate |          |          |
|---------------|---------------|-------------|------------|----------|----------|
|               |               |             | X          | Y        | Z        |
| 1             | 6             | 0           | -1.30021   | -0.64052 | -0.45374 |
| 2             | 6             | 0           | -0.71747   | -1.74543 | 0.198371 |
| 3             | 6             | 0           | 0.752776   | -1.73747 | 0.188919 |
| 4             | 6             | 0           | 1.315605   | -0.61747 | -0.45621 |
| 5             | 33            | 0           | -0.00316   | 0.533933 | -1.33402 |
| 6             | 6             | 0           | -2.67791   | -0.52245 | -0.47684 |
| 7             | 7             | 0           | -3.45638   | -1.44786 | 0.128897 |
| 8             | 6             | 0           | -2.91253   | -2.51983 | 0.758146 |
| 9             | 6             | 0           | -1.54302   | -2.69784 | 0.807906 |
| 10            | 6             | 0           | 1.596258   | -2.69262 | 0.767191 |
| 11            | 6             | 0           | 2.963164   | -2.49334 | 0.712665 |
| 12            | 7             | 0           | 3.486631   | -1.39985 | 0.10518  |
| 13            | 6             | 0           | 2.69059    | -0.47715 | -0.48319 |
| 14            | 6             | 0           | -0.02077   | 2.07553  | -0.12921 |
| 15            | 6             | 0           | -0.04162   | 3.338021 | -0.73463 |
| 16            | 6             | 0           | -0.05616   | 4.493729 | 0.054235 |
| 17            | 6             | 0           | -0.04912   | 4.388719 | 1.447059 |
| 18            | 6             | 0           | -0.02732   | 3.1268   | 2.053789 |
| 19            | 6             | 0           | -0.01331   | 1.973982 | 1.267688 |
| 20            | 6             | 0           | -4.93368   | -1.32527 | 0.064835 |
| 21            | 6             | 0           | 4.957      | -1.20301 | 0.108414 |
| 22            | 1             | 0           | -3.19656   | 0.293801 | -0.96337 |
| 23            | 1             | 0           | -3.60711   | -3.21402 | 1.212729 |
| 24            | 1             | 0           | -1.15106   | -3.56365 | 1.32745  |
| 25            | 1             | 0           | 1.221519   | -3.58199 | 1.258528 |
| 26            | 1             | 0           | 3.669966   | -3.18809 | 1.14661  |
| 27            | 1             | 0           | 3.194943   | 0.354888 | -0.95849 |
| 28            | 1             | 0           | -0.04675   | 3.426326 | -1.81717 |
| 29            | 1             | 0           | -0.07271   | 5.469762 | -0.42096 |
| 30            | 1             | 0           | -0.06045   | 5.284982 | 2.05984  |
| 31            | 1             | 0           | -0.02162   | 3.041204 | 3.136217 |
| 32            | 1             | 0           | 0.003748   | 1.003272 | 1.754163 |
| 33            | 1             | 0           | -5.19143   | -0.30273 | -0.20191 |
| 34            | 1             | 0           | -5.31048   | -2.01688 | -0.69037 |
| 35            | 1             | 0           | -5.35046   | -1.56936 | 1.040856 |
| 36            | 1             | 0           | 5.442373   | -2.17458 | 0.036165 |
| 37            | 1             | 0           | 5.231643   | -0.58814 | -0.7461  |
| 38            | 1             | 0           | 5.24331    | -0.70697 | 1.037456 |

---

**Table S16.** Atom coordinates and absolute energy levels for **4<sup>1+</sup>** optimized in the **S<sub>0</sub>** state.

**4<sup>1+</sup>** (S<sub>0</sub> state):  $E(\text{UB3LYP}) = -3039.35628620$  A.U.

| Center Number | Atomic Number | Atomic Type | Coordinate |          |          |
|---------------|---------------|-------------|------------|----------|----------|
|               |               |             | X          | Y        | Z        |
| 1             | 6             | 0           | -1.33002   | -0.60378 | -0.46851 |
| 2             | 6             | 0           | -0.73743   | -1.69749 | 0.247789 |
| 3             | 6             | 0           | 0.682967   | -1.72371 | 0.239189 |
| 4             | 6             | 0           | 1.305983   | -0.64852 | -0.47971 |
| 5             | 33            | 0           | 0.003501   | 0.522801 | -1.35261 |
| 6             | 6             | 0           | -2.68741   | -0.46566 | -0.52581 |
| 7             | 7             | 0           | -3.51773   | -1.35335 | 0.118189 |
| 8             | 6             | 0           | -2.97854   | -2.41065 | 0.808889 |
| 9             | 6             | 0           | -1.62615   | -2.60608 | 0.892789 |
| 10            | 6             | 0           | 1.545653   | -2.67042 | 0.863889 |
| 11            | 6             | 0           | 2.903555   | -2.52304 | 0.765389 |
| 12            | 7             | 0           | 3.47197    | -1.48595 | 0.068489 |
| 13            | 6             | 0           | 2.666385   | -0.55864 | -0.55151 |
| 14            | 6             | 0           | 0.034624   | 2.0624   | -0.13161 |
| 15            | 6             | 0           | 0.049844   | 3.3382   | -0.70851 |
| 16            | 6             | 0           | 0.070661   | 4.4816   | 0.099489 |
| 17            | 6             | 0           | 0.076659   | 4.352999 | 1.490589 |
| 18            | 6             | 0           | 0.06164    | 3.0793   | 2.073289 |
| 19            | 6             | 0           | 0.040522   | 1.9418   | 1.264289 |
| 20            | 6             | 0           | -4.97633   | -1.23392 | -0.01941 |
| 21            | 6             | 0           | 4.932873   | -1.32837 | 0.028989 |
| 22            | 1             | 0           | -3.1838    | 0.335049 | -1.06091 |
| 23            | 1             | 0           | -3.68955   | -3.07504 | 1.283489 |
| 24            | 1             | 0           | -1.26216   | -3.45418 | 1.460989 |
| 25            | 1             | 0           | 1.15854    | -3.51632 | 1.420289 |
| 26            | 1             | 0           | 3.595244   | -3.21705 | 1.225789 |
| 27            | 1             | 0           | 3.186096   | 0.226652 | -1.08721 |
| 28            | 1             | 0           | 0.045245   | 3.4462   | -1.78991 |
| 29            | 1             | 0           | 0.082176   | 5.466299 | -0.35841 |
| 30            | 1             | 0           | 0.092773   | 5.238399 | 2.119189 |
| 31            | 1             | 0           | 0.066138   | 2.9741   | 3.154389 |
| 32            | 1             | 0           | 0.028508   | 0.9601   | 1.729589 |
| 33            | 1             | 0           | -5.23461   | -0.19102 | -0.20211 |
| 34            | 1             | 0           | -5.32994   | -1.84832 | -0.85251 |
| 35            | 1             | 0           | -5.45433   | -1.56212 | 0.904189 |
| 36            | 1             | 0           | 5.403058   | -2.30458 | 0.144989 |
| 37            | 1             | 0           | 5.223179   | -0.90528 | -0.93321 |
| 38            | 1             | 0           | 5.265283   | -0.66628 | 0.833789 |

**Table S17.** Atom coordinates and absolute energy levels for **4<sup>o</sup>** optimized in the S<sub>0</sub> state.

---

**4<sup>o</sup>** (S<sub>0</sub> state):  $E(\text{B3LYP}) = -3039.47667534$  A.U.

---

| Center Number | Atomic Number | Atomic Type | Coordinate |          |          |
|---------------|---------------|-------------|------------|----------|----------|
|               |               |             | X          | Y        | Z        |
| 1             | 6             | 0           | -1.37237   | -0.5365  | -0.46001 |
| 2             | 6             | 0           | -0.7874    | -1.60965 | 0.346367 |
| 3             | 6             | 0           | 0.589048   | -1.69455 | 0.325361 |
| 4             | 6             | 0           | 1.276442   | -0.702   | -0.50345 |
| 5             | 33            | 0           | 0.008355   | 0.51585  | -1.3567  |
| 6             | 6             | 0           | -2.7118    | -0.37867 | -0.56885 |
| 7             | 7             | 0           | -3.60553   | -1.18275 | 0.142823 |
| 8             | 6             | 0           | -3.08466   | -2.21976 | 0.913515 |
| 9             | 6             | 0           | -1.751     | -2.44279 | 1.043936 |
| 10            | 6             | 0           | 1.463901   | -2.6367  | 1.000562 |
| 11            | 6             | 0           | 2.807575   | -2.6003  | 0.802378 |
| 12            | 7             | 0           | 3.417805   | -1.69478 | -0.06123 |
| 13            | 6             | 0           | 2.618219   | -0.73009 | -0.67807 |
| 14            | 6             | 0           | 0.128182   | 2.05871  | -0.12938 |
| 15            | 6             | 0           | 0.186868   | 3.340713 | -0.69002 |
| 16            | 6             | 0           | 0.270069   | 4.476622 | 0.125636 |
| 17            | 6             | 0           | 0.29507    | 4.336403 | 1.515576 |
| 18            | 6             | 0           | 0.236986   | 3.058154 | 2.086218 |
| 19            | 6             | 0           | 0.153555   | 1.930415 | 1.266545 |
| 20            | 6             | 0           | -5.0215    | -1.17411 | -0.20414 |
| 21            | 6             | 0           | 4.868166   | -1.55084 | -0.06611 |
| 22            | 1             | 0           | -3.17389   | 0.391702 | -1.17731 |
| 23            | 1             | 0           | -3.82266   | -2.83007 | 1.422086 |
| 24            | 1             | 0           | -1.42654   | -3.255   | 1.686967 |
| 25            | 1             | 0           | 1.063119   | -3.39296 | 1.668257 |
| 26            | 1             | 0           | 3.481204   | -3.29257 | 1.294742 |
| 27            | 1             | 0           | 3.153145   | -0.02352 | -1.30371 |
| 28            | 1             | 0           | 0.168027   | 3.459425 | -1.77088 |
| 29            | 1             | 0           | 0.315252   | 5.464447 | -0.32463 |
| 30            | 1             | 0           | 0.359732   | 5.214844 | 2.151345 |
| 31            | 1             | 0           | 0.25608    | 2.943068 | 3.166614 |
| 32            | 1             | 0           | 0.10844    | 0.943507 | 1.719179 |
| 33            | 1             | 0           | -5.33236   | -0.1546  | -0.44425 |
| 34            | 1             | 0           | -5.23789   | -1.82062 | -1.06658 |
| 35            | 1             | 0           | -5.60903   | -1.52072 | 0.649257 |
| 36            | 1             | 0           | 5.333861   | -2.53076 | 0.062111 |
| 37            | 1             | 0           | 5.190484   | -1.14046 | -1.02591 |
| 38            | 1             | 0           | 5.219241   | -0.8865  | 0.736256 |

---

**Table S18.** Atom coordinates and absolute energy levels for **5** optimized in the  $S_0$  state.**5** ( $S_0$  state):  $E(\text{B3LYP}) = -1067.22696357$  A.U.

| Center Number | Atomic Number | Atomic Type | Coordinate |          |          |
|---------------|---------------|-------------|------------|----------|----------|
|               |               |             | X          | Y        | Z        |
| 1             | 7             | 0           | 1.469373   | -3.5138  | -0.06998 |
| 2             | 7             | 0           | 1.469343   | 3.513808 | -0.06998 |
| 3             | 6             | 0           | -1.89422   | -7E-06   | -0.31919 |
| 4             | 6             | 0           | 1.825281   | -0.73531 | 0.099952 |
| 5             | 6             | 0           | 1.825275   | 0.735324 | 0.099952 |
| 6             | 6             | 0           | 0.706955   | 1.284372 | -0.56314 |
| 7             | 6             | 0           | 0.584431   | -2.67483 | -0.62551 |
| 8             | 6             | 0           | 2.531659   | -2.97769 | 0.552893 |
| 9             | 6             | 0           | 2.763121   | -1.60584 | 0.66369  |
| 10            | 6             | 0           | 0.584408   | 2.67483  | -0.62551 |
| 11            | 6             | 0           | 2.531632   | 2.977708 | 0.552898 |
| 12            | 6             | 0           | 2.763107   | 1.605857 | 0.663692 |
| 13            | 6             | 0           | -3.12318   | 0.000001 | -0.99525 |
| 14            | 6             | 0           | -4.32713   | 0        | -0.28224 |
| 15            | 6             | 0           | -4.31082   | -0.00001 | 1.113089 |
| 16            | 6             | 0           | -3.0889    | -0.00002 | 1.796318 |
| 17            | 6             | 0           | -1.8888    | -1.8E-05 | 1.085764 |
| 18            | 6             | 0           | 0.706965   | -1.28437 | -0.56315 |
| 19            | 1             | 0           | -0.25761   | -3.1393  | -1.13474 |
| 20            | 1             | 0           | 3.235387   | -3.68621 | 0.983812 |
| 21            | 1             | 0           | 3.646778   | -1.24107 | 1.178628 |
| 22            | 1             | 0           | -0.25763   | 3.139293 | -1.13474 |
| 23            | 1             | 0           | 3.235354   | 3.686236 | 0.983819 |
| 24            | 1             | 0           | 3.646767   | 1.241095 | 1.178631 |
| 25            | 1             | 0           | -3.13904   | 0.000008 | -2.08189 |
| 26            | 1             | 0           | -5.27189   | 0.000007 | -0.81812 |
| 27            | 1             | 0           | -5.24396   | -1.1E-05 | 1.668986 |
| 28            | 1             | 0           | -3.07245   | -2.8E-05 | 2.8825   |
| 29            | 1             | 0           | -0.94652   | -2.6E-05 | 1.626097 |
| 30            | 15            | 0           | -0.35233   | -3E-06   | -1.35192 |

**Table S19.** Atom coordinates and absolute energy levels for **6** optimized in the  $S_0$  state.**6** ( $S_0$  state):  $E(\text{B3LYP}) = -1142.47263083$  A.U.

| Center Number | Atomic Number | Atomic Type | coordinate |          |          |
|---------------|---------------|-------------|------------|----------|----------|
|               |               |             | X          | Y        | Z        |
| 1             | 6             | 0           | 0.750415   | -1.30129 | 0.42856  |
| 2             | 6             | 0           | 1.862511   | -0.74138 | -0.22807 |
| 3             | 6             | 0           | 1.862551   | 0.741304 | -0.22803 |
| 4             | 6             | 0           | 0.750488   | 1.301239 | 0.428646 |
| 5             | 15            | 0           | -0.35597   | -1.8E-05 | 1.096428 |
| 6             | 6             | 0           | 0.64298    | -2.68732 | 0.519216 |
| 7             | 7             | 0           | 1.555044   | -3.52254 | -0.00378 |
| 8             | 6             | 0           | 2.604813   | -2.97836 | -0.63465 |
| 9             | 6             | 0           | 2.812598   | -1.60178 | -0.77721 |
| 10            | 6             | 0           | 2.812674   | 1.60169  | -0.77713 |
| 11            | 6             | 0           | 2.604961   | 2.978266 | -0.63448 |
| 12            | 7             | 0           | 1.555226   | 3.522472 | -0.00357 |
| 13            | 6             | 0           | 0.643126   | 2.687265 | 0.519383 |
| 14            | 6             | 0           | -1.88777   | 0.000065 | 0.101919 |
| 15            | 6             | 0           | -3.10532   | -0.00017 | 0.796015 |
| 16            | 6             | 0           | -4.3109    | -0.00015 | 0.088525 |
| 17            | 6             | 0           | -4.30343   | 0.000112 | -1.30815 |
| 18            | 6             | 0           | -3.08891   | 0.000359 | -2.00341 |
| 19            | 6             | 0           | -1.88333   | 0.000338 | -1.30158 |
| 20            | 8             | 0           | -0.6329    | -0.00008 | 2.57298  |
| 21            | 1             | 0           | -0.19671   | -3.15282 | 1.029724 |
| 22            | 1             | 0           | 3.324679   | -3.68102 | -1.04839 |
| 23            | 1             | 0           | 3.691607   | -1.2344  | -1.29749 |
| 24            | 1             | 0           | 3.691658   | 1.234293 | -1.29744 |
| 25            | 1             | 0           | 3.324858   | 3.680922 | -1.04819 |
| 26            | 1             | 0           | -0.19653   | 3.152777 | 1.029925 |
| 27            | 1             | 0           | -3.09316   | -0.00036 | 1.881712 |
| 28            | 1             | 0           | -5.25277   | -0.00034 | 0.62918  |
| 29            | 1             | 0           | -5.24089   | 0.000129 | -1.85672 |
| 30            | 1             | 0           | -3.08208   | 0.00057  | -3.08938 |
| 31            | 1             | 0           | -0.94456   | 0.000538 | -1.84913 |

**Table S20.** Atom coordinates and absolute energy levels for  $7^{2+}$  optimized in the  $S_0$  state.

$7^{2+}$  ( $S_0$  state):  $E(\text{B3LYP}) = -1146.74523692$  A.U.

| Center Number | Atomic Number | Atomic Type | coordinate |          |          |
|---------------|---------------|-------------|------------|----------|----------|
|               |               |             | X          | Y        | Z        |
| 1             | 6             | 0           | -1.27208   | -0.551   | -0.51174 |
| 2             | 6             | 0           | -0.732     | -1.70345 | 0.099471 |
| 3             | 6             | 0           | 0.73356    | -1.69982 | 0.105715 |
| 4             | 6             | 0           | 1.272986   | -0.54828 | -0.50782 |
| 5             | 15            | 0           | 0.000465   | 0.529659 | -1.28864 |
| 6             | 6             | 0           | -2.65001   | -0.40586 | -0.57461 |
| 7             | 7             | 0           | -3.4589    | -1.34771 | -0.04218 |
| 8             | 6             | 0           | -2.95463   | -2.46907 | 0.536558 |
| 9             | 6             | 0           | -1.59219   | -2.67991 | 0.615946 |
| 10            | 6             | 0           | 1.594189   | -2.66566 | 0.640665 |
| 11            | 6             | 0           | 2.956516   | -2.45178 | 0.564785 |
| 12            | 7             | 0           | 3.460366   | -1.33677 | -0.02629 |
| 13            | 6             | 0           | 2.650623   | -0.39993 | -0.56668 |
| 14            | 6             | 0           | -0.00091   | 2.08109  | -0.29256 |
| 15            | 6             | 0           | -0.00068   | 3.286457 | -1.01188 |
| 16            | 6             | 0           | -0.00176   | 4.508896 | -0.33197 |
| 17            | 6             | 0           | -0.00314   | 4.530797 | 1.064156 |
| 18            | 6             | 0           | -0.00341   | 3.330206 | 1.785466 |
| 19            | 6             | 0           | -0.00226   | 2.108157 | 1.112945 |
| 20            | 6             | 0           | -4.93193   | -1.16969 | -0.07793 |
| 21            | 6             | 0           | 4.934407   | -1.18004 | -0.10676 |
| 22            | 1             | 0           | -3.13755   | 0.44423  | -1.03467 |
| 23            | 1             | 0           | -3.67785   | -3.17415 | 0.925164 |
| 24            | 1             | 0           | -1.23085   | -3.58897 | 1.080736 |
| 25            | 1             | 0           | 1.2333     | -3.56726 | 1.120086 |
| 26            | 1             | 0           | 3.679609   | -3.15054 | 0.964762 |
| 27            | 1             | 0           | 3.13666    | 0.448657 | -1.03117 |
| 28            | 1             | 0           | 0.000315   | 3.272583 | -2.09776 |
| 29            | 1             | 0           | -0.00158   | 5.437326 | -0.89443 |
| 30            | 1             | 0           | -0.00403   | 5.479404 | 1.592363 |
| 31            | 1             | 0           | -0.00448   | 3.346157 | 2.871035 |
| 32            | 1             | 0           | -0.00245   | 1.185772 | 1.685564 |
| 33            | 1             | 0           | -5.16615   | -0.2813  | -0.65956 |
| 34            | 1             | 0           | -5.38063   | -2.04749 | -0.5425  |
| 35            | 1             | 0           | -5.29665   | -1.05419 | 0.943384 |
| 36            | 1             | 0           | 5.362351   | -1.37508 | 0.875723 |
| 37            | 1             | 0           | 5.323058   | -1.8919  | -0.83641 |
| 38            | 1             | 0           | 5.165919   | -0.1635  | -0.41601 |

**Table S21.** Atom coordinates and absolute energy levels for  $7^{1+}$  optimized in the  $S_0$  state.

$7^{1+}$  ( $S_0$  state):  $E(\text{UB3LYP}) = -1146.90061921$  A.U.

| Center Number | Atomic Number | Atomic Type | coordinate |          |          |
|---------------|---------------|-------------|------------|----------|----------|
|               |               |             | X          | Y        | Z        |
| 1             | 6             | 0           | -1.25973   | -0.59609 | -0.57742 |
| 2             | 6             | 0           | -0.65121   | -1.6832  | 0.140258 |
| 3             | 6             | 0           | 0.766101   | -1.63421 | 0.146333 |
| 4             | 6             | 0           | 1.304995   | -0.50921 | -0.56829 |
| 5             | 15            | 0           | -0.01028   | 0.514968 | -1.36412 |
| 6             | 6             | 0           | -2.62155   | -0.51183 | -0.67987 |
| 7             | 7             | 0           | -3.43277   | -1.45038 | -0.08535 |
| 8             | 6             | 0           | -2.87566   | -2.49573 | 0.610361 |
| 9             | 6             | 0           | -1.51994   | -2.64383 | 0.732751 |
| 10            | 6             | 0           | 1.693303   | -2.52845 | 0.754081 |
| 11            | 6             | 0           | 3.036424   | -2.28717 | 0.644598 |
| 12            | 7             | 0           | 3.526571   | -1.20208 | -0.04118 |
| 13            | 6             | 0           | 2.658867   | -0.3307  | -0.65688 |
| 14            | 6             | 0           | -0.06786   | 2.039994 | -0.30884 |
| 15            | 6             | 0           | -0.14509   | 3.275119 | -0.97008 |
| 16            | 6             | 0           | -0.19451   | 4.468741 | -0.24024 |
| 17            | 6             | 0           | -0.16569   | 4.434714 | 1.155437 |
| 18            | 6             | 0           | -0.0876    | 3.205558 | 1.822947 |
| 19            | 6             | 0           | -0.03902   | 2.015008 | 1.096394 |
| 20            | 6             | 0           | -4.89335   | -1.28547 | -0.1265  |
| 21            | 6             | 0           | 4.97847    | -1.02571 | -0.19374 |
| 22            | 1             | 0           | -3.1322    | 0.277409 | -1.21845 |
| 23            | 1             | 0           | -3.5758    | -3.19574 | 1.048317 |
| 24            | 1             | 0           | -1.13833   | -3.49568 | 1.283787 |
| 25            | 1             | 0           | 1.365379   | -3.39682 | 1.313644 |
| 26            | 1             | 0           | 3.779341   | -2.93499 | 1.092211 |
| 27            | 1             | 0           | 3.118367   | 0.490649 | -1.19322 |
| 28            | 1             | 0           | -0.16662   | 3.306817 | -2.05596 |
| 29            | 1             | 0           | -0.25481   | 5.418567 | -0.76322 |
| 30            | 1             | 0           | -0.2036    | 5.359441 | 1.723629 |
| 31            | 1             | 0           | -0.06491   | 3.175789 | 2.908443 |
| 32            | 1             | 0           | 0.021725   | 1.068761 | 1.626353 |
| 33            | 1             | 0           | -5.17586   | -0.81427 | -1.06822 |
| 34            | 1             | 0           | -5.36799   | -2.2644  | -0.06203 |
| 35            | 1             | 0           | -5.22796   | -0.66239 | 0.708004 |
| 36            | 1             | 0           | 5.481      | -1.37867 | 0.70718  |
| 37            | 1             | 0           | 5.339777   | -1.5897  | -1.05858 |
| 38            | 1             | 0           | 5.19842    | 0.032699 | -0.33229 |



**Table S22.** Atom coordinates and absolute energy levels for 7<sup>o</sup> optimized in the S<sub>0</sub> state.

---

7<sup>o</sup> (S<sub>0</sub> state):  $E(\text{B3LYP}) = -1147.02147650$  A.U.

---

| Center Number | Atomic Number | Atomic Type | Coordinate |          |          |
|---------------|---------------|-------------|------------|----------|----------|
|               |               |             | X          | Y        | Z        |
| 1             | 6             | 0           | -1.13443   | -0.79115 | -0.60792 |
| 2             | 6             | 0           | -0.35539   | -1.64795 | 0.293664 |
| 3             | 6             | 0           | 0.998752   | -1.39351 | 0.281931 |
| 4             | 6             | 0           | 1.397387   | -0.30579 | -0.61966 |
| 5             | 15            | 0           | -0.06461   | 0.483089 | -1.41717 |
| 6             | 6             | 0           | -2.45934   | -0.99597 | -0.80669 |
| 7             | 7             | 0           | -3.14825   | -2.01474 | -0.14509 |
| 8             | 6             | 0           | -2.45763   | -2.77951 | 0.792957 |
| 9             | 6             | 0           | -1.12453   | -2.64243 | 1.017148 |
| 10            | 6             | 0           | 2.089414   | -2.0475  | 0.98035  |
| 11            | 6             | 0           | 3.375011   | -1.66717 | 0.761251 |
| 12            | 7             | 0           | 3.719512   | -0.63522 | -0.11049 |
| 13            | 6             | 0           | 2.702636   | 0.007724 | -0.81373 |
| 14            | 6             | 0           | -0.37803   | 1.975265 | -0.33674 |
| 15            | 6             | 0           | -1.21516   | 2.978276 | -0.8528  |
| 16            | 6             | 0           | -1.51652   | 4.118686 | -0.10007 |
| 17            | 6             | 0           | -0.97227   | 4.276052 | 1.177936 |
| 18            | 6             | 0           | -0.12618   | 3.289227 | 1.69695  |
| 19            | 6             | 0           | 0.170338   | 2.1485   | 0.945027 |
| 20            | 6             | 0           | -4.60664   | -2.03236 | -0.16395 |
| 21            | 6             | 0           | 5.111573   | -0.44395 | -0.5001  |
| 22            | 1             | 0           | -3.05959   | -0.39836 | -1.48443 |
| 23            | 1             | 0           | -3.05809   | -3.5121  | 1.320234 |
| 24            | 1             | 0           | -0.65287   | -3.2965  | 1.743923 |
| 25            | 1             | 0           | 1.901154   | -2.84482 | 1.692583 |
| 26            | 1             | 0           | 4.209977   | -2.13863 | 1.267042 |
| 27            | 1             | 0           | 3.031631   | 0.788379 | -1.49165 |
| 28            | 1             | 0           | -1.63228   | 2.871187 | -1.85152 |
| 29            | 1             | 0           | -2.16568   | 4.884464 | -0.51556 |
| 30            | 1             | 0           | -1.19927   | 5.162732 | 1.762952 |
| 31            | 1             | 0           | 0.303213   | 3.407476 | 2.688198 |
| 32            | 1             | 0           | 0.831776   | 1.392297 | 1.356674 |
| 33            | 1             | 0           | -4.96266   | -1.72645 | -1.15034 |
| 34            | 1             | 0           | -4.96221   | -3.0468  | 0.030249 |
| 35            | 1             | 0           | -5.03593   | -1.35774 | 0.590251 |
| 36            | 1             | 0           | 5.761172   | -0.62875 | 0.358638 |
| 37            | 1             | 0           | 5.405584   | -1.11909 | -1.31582 |
| 38            | 1             | 0           | 5.260435   | 0.587279 | -0.82818 |

---

**Table S23.** Atom coordinates and absolute energy levels for  $8^{2+}$  optimized in the  $S_0$  state.

$8^{2+}$  ( $S_0$  state):  $E(\text{B3LYP}) = -3501.33323666$  A.U.

| Center Number | Atomic Number | Atomic Type | Coordinate |          |          |
|---------------|---------------|-------------|------------|----------|----------|
|               |               |             | X          | Y        | Z        |
| 1             | 6             | 0           | -1.3128    | -0.15206 | 0.358708 |
| 2             | 6             | 0           | -0.43422   | -0.83079 | 1.22918  |
| 3             | 6             | 0           | 0.986762   | -0.53107 | 0.99867  |
| 4             | 6             | 0           | 1.2186     | 0.384216 | -0.04702 |
| 5             | 33            | 0           | -0.40225   | 0.903528 | -1.01762 |
| 6             | 6             | 0           | -2.67369   | -0.34853 | 0.487946 |
| 7             | 7             | 0           | -3.16178   | -1.16345 | 1.452482 |
| 8             | 6             | 0           | -2.33319   | -1.82321 | 2.296657 |
| 9             | 6             | 0           | -0.95954   | -1.68317 | 2.20523  |
| 10            | 6             | 0           | 2.074569   | -1.04773 | 1.713652 |
| 11            | 6             | 0           | 3.347685   | -0.62858 | 1.380892 |
| 12            | 7             | 0           | 3.552496   | 0.261123 | 0.377372 |
| 13            | 6             | 0           | 2.518744   | 0.757686 | -0.33893 |
| 14            | 6             | 0           | -0.68144   | 2.72065  | -0.34317 |
| 15            | 6             | 0           | -1.03691   | 3.686425 | -1.29277 |
| 16            | 6             | 0           | -1.25628   | 5.010447 | -0.89661 |
| 17            | 6             | 0           | -1.12007   | 5.369002 | 0.446644 |
| 18            | 6             | 0           | -0.76475   | 4.403602 | 1.396852 |
| 19            | 6             | 0           | -0.54663   | 3.082831 | 1.002791 |
| 20            | 6             | 0           | -4.65466   | -1.31314 | 1.606095 |
| 21            | 6             | 0           | 4.960408   | 0.693457 | 0.065002 |
| 22            | 6             | 0           | -5.34354   | -1.66273 | 0.308416 |
| 23            | 6             | 0           | 5.848839   | -0.46636 | -0.32282 |
| 24            | 6             | 0           | -6.15926   | -0.72028 | -0.33186 |
| 25            | 6             | 0           | -6.80998   | -1.04492 | -1.52663 |
| 26            | 6             | 0           | -6.64579   | -2.31303 | -2.08891 |
| 27            | 6             | 0           | -5.83436   | -3.25968 | -1.45207 |
| 28            | 6             | 0           | -5.18949   | -2.93857 | -0.25699 |
| 29            | 6             | 0           | 6.891849   | -0.8656  | 0.523349 |
| 30            | 6             | 0           | 7.72724    | -1.92751 | 0.161503 |
| 31            | 6             | 0           | 7.521444   | -2.59839 | -1.04623 |
| 32            | 6             | 0           | 6.483065   | -2.20118 | -1.89709 |
| 33            | 6             | 0           | 5.652259   | -1.13869 | -1.53937 |
| 34            | 1             | 0           | -3.40768   | 0.124864 | -0.15187 |
| 35            | 1             | 0           | -2.80037   | -2.45793 | 3.037574 |
| 36            | 1             | 0           | -0.33637   | -2.23507 | 2.897878 |
| 37            | 1             | 0           | 1.957918   | -1.75889 | 2.522069 |
| 38            | 1             | 0           | 4.229093   | -0.98688 | 1.895582 |
| 39            | 1             | 0           | 2.772245   | 1.451231 | -1.13067 |
| 40            | 1             | 0           | -1.14368   | 3.413389 | -2.33865 |
| 41            | 1             | 0           | -1.53179   | 5.755352 | -1.63685 |
| 42            | 1             | 0           | -1.28972   | 6.396271 | 0.754691 |
| 43            | 1             | 0           | -0.65853   | 4.679148 | 2.44173  |
| 44            | 1             | 0           | -0.27323   | 2.345624 | 1.751809 |
| 45            | 1             | 0           | -4.80068   | -2.08744 | 2.35916  |
| 46            | 1             | 0           | -5.02071   | -0.36727 | 2.010582 |
| 47            | 1             | 0           | 4.879988   | 1.42666  | -0.73773 |
| 48            | 1             | 0           | 5.335664   | 1.201336 | 0.955173 |
| 49            | 1             | 0           | -6.29252   | 0.265813 | 0.104774 |
| 50            | 1             | 0           | -7.44221   | -0.30851 | -2.01295 |

|    |   |   |          |          |          |
|----|---|---|----------|----------|----------|
| 51 | 1 | 0 | -7.15033 | -2.56653 | -3.01636 |
| 52 | 1 | 0 | -5.71038 | -4.24865 | -1.88254 |
| 53 | 1 | 0 | -4.56834 | -3.68138 | 0.236231 |
| 54 | 1 | 0 | 7.058607 | -0.34369 | 1.461827 |
| 55 | 1 | 0 | 8.534616 | -2.22682 | 0.822692 |
| 56 | 1 | 0 | 8.168827 | -3.42335 | -1.32781 |
| 57 | 1 | 0 | 6.324928 | -2.71488 | -2.84039 |
| 58 | 1 | 0 | 4.85473  | -0.83126 | -2.21039 |

---

**Table S24.** Atom coordinates and absolute energy levels for **8<sup>1+</sup>** optimized in the **S<sub>0</sub>** state.

**8<sup>1+</sup>** (S<sub>0</sub> state):  $E(\text{UB3LYP}) = -3501.48962697$  A.U.

| Center Number | Atomic Number | Atomic Type | Coordinate |          |          |
|---------------|---------------|-------------|------------|----------|----------|
|               |               |             | X          | Y        | Z        |
| 1             | 6             | 0           | -1.35025   | 0.035266 | 0.343127 |
| 2             | 6             | 0           | -0.48701   | -0.5799  | 1.311852 |
| 3             | 6             | 0           | 0.901633   | -0.36467 | 1.10215  |
| 4             | 6             | 0           | 1.228594   | 0.430279 | -0.04705 |
| 5             | 33            | 0           | -0.35498   | 0.956591 | -1.06853 |
| 6             | 6             | 0           | -2.70407   | -0.11227 | 0.42647  |
| 7             | 7             | 0           | -3.2763    | -0.82939 | 1.453684 |
| 8             | 6             | 0           | -2.47635   | -1.42011 | 2.398891 |
| 9             | 6             | 0           | -1.11062   | -1.32234 | 2.355518 |
| 10            | 6             | 0           | 1.988915   | -0.83682 | 1.894514 |
| 11            | 6             | 0           | 3.273046   | -0.52416 | 1.542628 |
| 12            | 7             | 0           | 3.557015   | 0.236221 | 0.432699 |
| 13            | 6             | 0           | 2.531388   | 0.699453 | -0.35739 |
| 14            | 6             | 0           | -0.55139   | 2.824674 | -0.48356 |
| 15            | 6             | 0           | -0.86397   | 3.770431 | -1.46769 |
| 16            | 6             | 0           | -1.01985   | 5.120175 | -1.12938 |
| 17            | 6             | 0           | -0.86254   | 5.529521 | 0.197089 |
| 18            | 6             | 0           | -0.54906   | 4.587657 | 1.185228 |
| 19            | 6             | 0           | -0.39503   | 3.242623 | 0.844342 |
| 20            | 6             | 0           | -4.75316   | -0.94495 | 1.526057 |
| 21            | 6             | 0           | 4.967548   | 0.530897 | 0.094052 |
| 22            | 6             | 0           | -5.35375   | -1.62926 | 0.313674 |
| 23            | 6             | 0           | 5.762138   | -0.70489 | -0.28517 |
| 24            | 6             | 0           | -6.24685   | -0.93873 | -0.5152  |
| 25            | 6             | 0           | -6.81822   | -1.56948 | -1.6262  |
| 26            | 6             | 0           | -6.49507   | -2.89635 | -1.91928 |
| 27            | 6             | 0           | -5.6016    | -3.59255 | -1.09588 |
| 28            | 6             | 0           | -5.03674   | -2.96374 | 0.014887 |
| 29            | 6             | 0           | 6.965384   | -0.99084 | 0.371759 |
| 30            | 6             | 0           | 7.726153   | -2.10749 | 0.007712 |
| 31            | 6             | 0           | 7.28372    | -2.95242 | -1.01279 |
| 32            | 6             | 0           | 6.079773   | -2.67454 | -1.67126 |
| 33            | 6             | 0           | 5.324134   | -1.55748 | -1.31062 |
| 34            | 1             | 0           | -3.39678   | 0.316968 | -0.28708 |
| 35            | 1             | 0           | -2.99006   | -1.96842 | 3.178168 |
| 36            | 1             | 0           | -0.53461   | -1.81674 | 3.129087 |
| 37            | 1             | 0           | 1.82947    | -1.43849 | 2.781784 |
| 38            | 1             | 0           | 4.128683   | -0.86068 | 2.114115 |
| 39            | 1             | 0           | 2.829076   | 1.288358 | -1.21638 |
| 40            | 1             | 0           | -0.98748   | 3.459067 | -2.50154 |
| 41            | 1             | 0           | -1.26249   | 5.845627 | -1.9004  |
| 42            | 1             | 0           | -0.98254   | 6.575891 | 0.462014 |
| 43            | 1             | 0           | -0.42565   | 4.901296 | 2.21785  |
| 44            | 1             | 0           | -0.15177   | 2.523435 | 1.621166 |
| 45            | 1             | 0           | -4.97775   | -1.50067 | 2.438639 |
| 46            | 1             | 0           | -5.16693   | 0.06095  | 1.640689 |
| 47            | 1             | 0           | 4.948845   | 1.249703 | -0.72841 |
| 48            | 1             | 0           | 5.426494   | 1.029075 | 0.952416 |
| 49            | 1             | 0           | -6.49898   | 0.094925 | -0.29292 |
| 50            | 1             | 0           | -7.51002   | -1.02253 | -2.25984 |

|    |   |   |          |          |          |
|----|---|---|----------|----------|----------|
| 51 | 1 | 0 | -6.93567 | -3.38746 | -2.78182 |
| 52 | 1 | 0 | -5.34948 | -4.62547 | -1.31696 |
| 53 | 1 | 0 | -4.34729 | -3.51287 | 0.650808 |
| 54 | 1 | 0 | 7.31185  | -0.33926 | 1.16975  |
| 55 | 1 | 0 | 8.657514 | -2.31684 | 0.525443 |
| 56 | 1 | 0 | 7.870512 | -3.82159 | -1.29475 |
| 57 | 1 | 0 | 5.73098  | -3.32681 | -2.46642 |
| 58 | 1 | 0 | 4.391758 | -1.35087 | -1.82939 |

---

**Table S25.** Atom coordinates and absolute energy levels for **8<sup>o</sup>** optimized in the S<sub>0</sub> state.

**8<sup>o</sup>** (S<sub>0</sub> state): *E*(B3LYP) = -3501.61307078 A.U.

| Center Number | Atomic Number | Atomic Type | Coordinate |          |          |
|---------------|---------------|-------------|------------|----------|----------|
|               |               |             | X          | Y        | Z        |
| 1             | 6             | 0           | -1.32668   | 0.625279 | 0.023699 |
| 2             | 6             | 0           | -0.6892    | -0.00388 | 1.182932 |
| 3             | 6             | 0           | 0.689368   | -0.00392 | 1.183053 |
| 4             | 6             | 0           | 1.327088   | 0.625215 | 0.023938 |
| 5             | 33            | 0           | 0.000338   | 1.364833 | -1.2048  |
| 6             | 6             | 0           | -2.66877   | 0.607021 | -0.14542 |
| 7             | 7             | 0           | -3.51662   | 0.036116 | 0.806371 |
| 8             | 6             | 0           | -2.94705   | -0.54733 | 1.938035 |
| 9             | 6             | 0           | -1.60722   | -0.57559 | 2.152204 |
| 10            | 6             | 0           | 1.607176   | -0.57571 | 2.152477 |
| 11            | 6             | 0           | 2.947043   | -0.54752 | 1.938557 |
| 12            | 7             | 0           | 3.516863   | 0.035991 | 0.807037 |
| 13            | 6             | 0           | 2.669211   | 0.606908 | -0.14491 |
| 14            | 6             | 0           | 0.000314   | 3.257873 | -0.62688 |
| 15            | 6             | 0           | 0.000363   | 4.239484 | -1.62549 |
| 16            | 6             | 0           | 0.000321   | 5.600303 | -1.29283 |
| 17            | 6             | 0           | 0.000239   | 5.98829  | 0.049573 |
| 18            | 6             | 0           | 0.000208   | 5.013289 | 1.055801 |
| 19            | 6             | 0           | 0.000233   | 3.658294 | 0.716638 |
| 20            | 6             | 0           | -4.9324    | -0.16422 | 0.522974 |
| 21            | 6             | 0           | 4.932579   | -0.16483 | 0.523652 |
| 22            | 6             | 0           | -5.29628   | -1.55632 | 0.016578 |
| 23            | 6             | 0           | 5.295959   | -1.55689 | 0.016775 |
| 24            | 6             | 0           | -6.58521   | -2.05804 | 0.248328 |
| 25            | 6             | 0           | -6.96247   | -3.3132  | -0.2378  |
| 26            | 6             | 0           | -6.04903   | -4.0894  | -0.95872 |
| 27            | 6             | 0           | -4.75986   | -3.59937 | -1.18898 |
| 28            | 6             | 0           | -4.38616   | -2.34132 | -0.70529 |
| 29            | 6             | 0           | 6.584822   | -2.059   | 0.248053 |
| 30            | 6             | 0           | 6.961648   | -3.31412 | -0.23853 |
| 31            | 6             | 0           | 6.047831   | -4.0899  | -0.95943 |
| 32            | 6             | 0           | 4.758713   | -3.59948 | -1.1892  |
| 33            | 6             | 0           | 4.385459   | -2.34147 | -0.70508 |
| 34            | 1             | 0           | -3.17037   | 1.043758 | -1.00261 |
| 35            | 1             | 0           | -3.65426   | -0.97231 | 2.64149  |
| 36            | 1             | 0           | -1.24236   | -1.03283 | 3.066629 |
| 37            | 1             | 0           | 1.242114   | -1.03297 | 3.066817 |
| 38            | 1             | 0           | 3.654107   | -0.97258 | 2.642117 |
| 39            | 1             | 0           | 3.17099    | 1.04364  | -1.002   |
| 40            | 1             | 0           | 0.000437   | 3.945116 | -2.67246 |
| 41            | 1             | 0           | 0.000363   | 6.350638 | -2.0787  |
| 42            | 1             | 0           | 0.00022    | 7.04231  | 0.312537 |
| 43            | 1             | 0           | 0.000154   | 5.310426 | 2.101093 |
| 44            | 1             | 0           | 0.000191   | 2.910286 | 1.504444 |
| 45            | 1             | 0           | -5.50705   | 0.052283 | 1.430697 |
| 46            | 1             | 0           | -5.22729   | 0.588034 | -0.21705 |
| 47            | 1             | 0           | 5.227823   | 0.587572 | -0.21607 |
| 48            | 1             | 0           | 5.50725    | 0.051117 | 1.431489 |
| 49            | 1             | 0           | -7.29844   | -1.4652  | 0.816478 |
| 50            | 1             | 0           | -7.96444   | -3.68683 | -0.04637 |

|    |   |   |          |          |          |
|----|---|---|----------|----------|----------|
| 51 | 1 | 0 | -6.33748 | -5.06754 | -1.33242 |
| 52 | 1 | 0 | -4.04155 | -4.19602 | -1.74419 |
| 53 | 1 | 0 | -3.38107 | -1.97388 | -0.88863 |
| 54 | 1 | 0 | 7.298345 | -1.46649 | 0.816181 |
| 55 | 1 | 0 | 7.963576 | -3.68804 | -0.04746 |
| 56 | 1 | 0 | 6.335938 | -5.06801 | -1.33347 |
| 57 | 1 | 0 | 4.040113 | -4.19581 | -1.74438 |
| 58 | 1 | 0 | 3.380419 | -1.97373 | -0.88808 |

---

## 11. Reference

- [1] T. Kato, S. Tanaka, K. Naka, *Chem. Lett.* **2015**, *44*, 1476-1478.
- [2] S. Durben, T. Baumgartner, *Angew. Chem. Int. Ed.* **2011**, *50*, 7948.
- [3] CrystalClear: Data Collection and Processing Software, Rigaku Corporation (1998-2014). Tokyo 196-8666, Japan.
- [4] *SIR2011*: M. C. Burla, R. Caliandro, M. Camalli, B. Carrozzini, G. L. Casciarano, C. Giacovazzo, M. Mallamo, A. Mazzone, G. Polidori, R. J. Spagna, *Appl. Cryst.* **2012**, *45*, 357.
- [5] *CrystalStructure 4.1*: Crystal Structure Analysis Package, Rigaku Corporation (2000-2014). Tokyo 196-8666, Japan.
- [6] *SHELXL2013*: G. M. Sheldrick, *Acta Cryst.* **2008**, *A64*, 112.
- [7] I. Fleming Ed., *Science of Synthesis Category 1, vol 4*; G. Thieme: Stuttgart, Germany 2002; Chapter 4.1, pp 13.
- [8] M. Grenness, K. B. Oldham, *Anal. Chem.* **1972**, *44*, 196.
- [9] J. Tomasi, B. Mennucci, R. Cammi, *Chem. Rev.* **2005**, *105*, 2999-3094.
- [10] A. E. Reed, L. A. Curtiss and F. Weinhold, *Chem. Rev.*, **1988**, *88*, 899-926.
- [11] Z. Chen, C. S. Wannere, C. Corminboeuf, R. Puchta and P. von R. Schleyer, *Chem. Rev.*, **2005**, *105*, 3842-3888.
- [12] Gaussian 09, Revision C.01, M. J. Frisch, G. W. Trucks, H. B. Schlegel, G. E. Scuseria, M. A. Robb, J. R. Cheeseman, G. Scalmani, V. Barone, B. Mennucci, G. A. Petersson, H. Nakatsuji, M. Caricato, X. Li, H. P. Hratchian, A. F. Izmaylov, J. Bloino, G. Zheng, J. L. Sonnenberg, M. Hada, M. Ehara, K. Toyota, R. Fukuda, J. Hasegawa, M. Ishida, T. Nakajima, Y. Honda, O. Kitao, H. Nakai, T. Vreven, J. A. Montgomery, Jr., J. E. Peralta, F. Ogliaro, M. Bearpark, J. J. Heyd, E. Brothers, K. N. Kudin, V. N. Staroverov, R. Kobayashi, J. Normand, K. Raghavachari, A. Rendell, J. C. Burant, S. S. Iyengar, J. Tomasi, M. Cossi, N. Rega, J. M. Millam, M. Klene, J. E. Knox, J. B. Cross, V. Bakken, C. Adamo, J. Jaramillo, R. Gomperts, R. E. Stratmann, O. Yazyev, A. J. Austin, R. Cammi, C. Pomelli, J. W. Ochterski, R. L. Martin, K. Morokuma, V. G. Zakrzewski, G. A. Voth, P. Salvador, J. J. Dannenberg, S. Dapprich, A. D. Daniels, Ö. Farkas, J. B. Foresman, J. V. Ortiz, J. Cioslowski, D. J. Fox, Gaussian, Inc., Wallingford CT, **2009**.
